# Supplementary material
Source: publisher figshare collection journal article supplement (https://acs.figshare.com/ndownloader/files/4419283)
Supplement: Supplementary file 1 [file 4419283]

# Mechanism of the Enantioselective Oxidation of Racemic Secondary Alcohols Catalyzed by Chiral Mn(III)-Salen Complexes

M. Kevin Brown, Megan M. Blewett, James R. Colombe and E. J. Corey\*

*Department of Chemistry and Chemical Biology,  
12 Oxford St., Cambridge, MA 02138*

## SUPPORTING INFORMATION

**General.** Infrared (IR) spectra were recorded on a Bruker Tensor 27,  $\nu_{\max}$  in  $\text{cm}^{-1}$ . Bands are characterized as broad (br), strong (s), medium (m), and weak (w).  $^1\text{H}$  NMR spectra were recorded on a Varian Unity INOVA 500 (500 MHz) spectrometer. Chemical shifts are reported in ppm from tetramethylsilane with the solvent resonance as the internal standard ( $\text{CDCl}_3$ :  $\delta$  7.26 ppm). Data are reported as follows: chemical shift, integration, multiplicity (s = singlet, d = doublet, t = triplet, q = quartet, br = broad, m = multiplet), and coupling constants (Hz).  $^{13}\text{C}$  NMR spectra were recorded on a Varian Unity INOVA 500 (125 MHz) spectrometer with complete proton decoupling. Chemical shifts are reported in ppm from tetramethylsilane with the solvent resonance as the internal standard ( $\text{CDCl}_3$ :  $\delta$  77.16 ppm). Enantiomer ratios were determined by chiral HPLC analysis (Chiralcel OD-H and OJ columns) in comparison with authentic racemic materials. Optical rotations were measured on a Perkin Elmer 241 Polarimeter.

Unless otherwise noted, all reactions have been carried out with distilled and degassed solvents under an atmosphere of dry  $\text{N}_2$  in oven- (135 °C) and flame-dried glassware with standard vacuum-line techniques. Diethyl ether, tetrahydrofuran and toluene were purified under a positive pressure of dry argon by passage through two columns of activated alumina. Dichloromethane was purified by distillation from calcium hydride immediately prior to use. All work-up and purification procedures were carried out with reagent grade solvents (purchased from VWR) in air.

### ■ Reagents and Catalysts:

**Mn-Cl Complex 2a** was purchased from Strem and was used as received.

**Mn-Cl Complexes 2b-2f** were prepared in accordance with literature procedures and purified by silica gel column chromatography (CH<sub>2</sub>Cl<sub>2</sub> to 10% MeOH/CH<sub>2</sub>Cl<sub>2</sub>, gradient).<sup>1</sup>

**Mn-Br Complex 12** was prepared in accordance with literature procedures and purified by silica gel column chromatography (CH<sub>2</sub>Cl<sub>2</sub> to 10% MeOH/CH<sub>2</sub>Cl<sub>2</sub>, gradient).<sup>2</sup>

**Bromine** was purchased from Aldrich and used as received.

**tert-Butylhypobromite** was prepared in accordance with literature procedures.<sup>3</sup>

**Diacetoxyiodobenzene** was purchased from Aldrich and used as received.

**(±)-1-Indanol** was purchased from Aldrich and purified by silica gel column chromatography (10% Et<sub>2</sub>O/pet ether to 80% Et<sub>2</sub>O/pet ether, gradient).

**(S)-1-Indanol and (R)-1-Indanol (>99% ee)** was prepared by oxidative kinetic resolution of (±)-1-indanol according to the general procedure shown below.

**(±)-1-D(1)-Indanol** was prepared by reduction of 1-indanone with NaBD<sub>4</sub> (MeOH/CH<sub>2</sub>Cl<sub>2</sub>, 0 °C to 23 °C, 30 min, quenched with NH<sub>4</sub>Cl and extracted with EtOAc) and purified by silica gel column chromatography (10% Et<sub>2</sub>O/pet ether to 80% Et<sub>2</sub>O/pet ether, gradient).

**(S)-1-D(1)-Indanol and (R)-1-D(1)-Indanol (>99% ee)** was prepared by oxidative kinetic resolution of (±)-1-D(1)-indanol according to the general procedure shown below.

**1-Indanone** was purchased from Aldrich and used as received.

**Indene** was purchased from Aldrich and distilled under N<sub>2</sub> prior to use.

**Iodosylbenzene** was prepared in accordance with literature procedures.<sup>4</sup>

**4-Methoxy-1-phenylethanol** was purchased from Alfa and used as received.

**1-Phenylethanol** was purchased from Alfa and used as received.

**1-Phenylpropanol** was purchased from Alfa and used as received.

**Potassium Acetate** was purchased from Fisher and used as received.

**Potassium Bromide** was purchased from Fisher and used as received.

**Potassium Chloride** was purchased from Fisher and used as received.

**Potassium Iodide** was purchased from Fisher and used as received.

**Sodium Bicarbonate** was purchased from Fisher and used as received.

**Tetrabutylammonium Acetate** was azeotroped with THF/toluene (1:1) three times prior to use.

**Tetraethylammonium Bromide** was purchased from Aldrich and used as received.

**4-Trifluoromethyl-1-phenylethanol** was purchased from Alfa and used as received.

---

(1) (a) Pospisil, P. J.; Carsten, D. H.; Jacobsen, E. N. *Chem. Eur. J.* **1996**, 2, 974-980. (b) Palucki, M.; Finney, N. S.; Pospisil, P. J.; Guler, M. L.; Ishida, T.; Jacobsen, E. N. *J. Am. Chem. Soc.* **1998**, 120, 948-954.

(2) Adam, W.; Roschmann, K. J.; Saha-Möller, C. R. *Eur. J. Org. Chem.* **2000**, 3519-3521.

(3) Walling, C.; McGuinness, J. A. *J. Am. Chem. Soc.* **1969**, 91, 2053-2058

(4) Saltzman, H.; Sharefkin, J. G. *Org. Syn., Coll. Vol. 5*, **1973**, 658.

## ■ Procedures:

### •Preparation of Hypobromous Acid:

To a tared 100 mL round-bottom flask equipped with stir bar and septum was added a small quantity of red HgO (Caution: TOXIC) in a fume hood. The flask was reweighed to determine the exact quantity of red HgO (454 mg, 2.09 mmol) present. The round-bottom flask was then covered in foil and H<sub>2</sub>O (21 mL) was added followed by the dropwise addition of Br<sub>2</sub> (108  $\mu$ L, 2.09 mmol). The pale yellow mixture with orange precipitate was allowed to stir for 10 min prior to use. We have found that solution of HOBr prepared in this manner should be used within 30 min of use.

### •Representative Experimental Procedure for Enantioselective Oxidation:

(Note: all operations carried out in air).<sup>5</sup> To a 5 mL round-bottom flask charged with ( $\pm$ )-1-indanol (33.5 mg, 0.250 mmol) and (*S,S*)-Mn-complex **2a** (3.2 mg, 0.0050 mmol) was added an aqueous solution of KBr (2.38 mg/mL H<sub>2</sub>O, 1.00 mL, 0.0200 mmol) and CH<sub>2</sub>Cl<sub>2</sub> (500  $\mu$ L). The biphasic mixture was allowed to stir for five minutes before PhI(OAc)<sub>2</sub> (56.4 mg, 0.175 mmol) was added. After 30 minutes the reaction was quenched upon addition of a saturated aqueous solution of Na<sub>2</sub>S<sub>2</sub>O<sub>3</sub>. The mixture was then extracted with Et<sub>2</sub>O (3 x 2 mL) and the combined organic extracts were passed through a short plug of silica gel (3 x 6 cm) eluted with Et<sub>2</sub>O (40 mL). The filtrate was concentrated and the residue purified by silica gel column chromatography (5% EtOAc/hexanes to 50% EtOAc/hexanes, gradient) to afford (*S*)-1-indanol (10.1 mg, 0.0750 mmol, 30.0% yield) as a white solid. **Optical Rotation:**  $[\alpha]_D^{22} +29.3$  (*c* 0.967, CHCl<sub>3</sub>) for an enantiomerically enriched sample of >99% ee. Lit.<sup>6</sup>  $[\alpha]_D^{22} +25.4$  (*c* 1.03, CHCl<sub>3</sub>) for the (*S*)-enantiomer. The enantiomeric purity was determined by HPLC analysis with a chiral column (Chiralpak OD-H column, 1.0 mL/min, 95:5 hexanes:isopropanol, 220 nm,  $t_{\text{major}} = 8.770$  min,  $t_{\text{minor}} = 9.800$  min).

**(S)-4-Methoxy-1-phenylethanol.**<sup>7</sup> Obtained by oxidative kinetic resolution according to the general procedure with (*S,S*)-**2a**. **Optical Rotation:**  $[\alpha]_D^{22} -44.2$  (*c* 0.450, CHCl<sub>3</sub>) for an enantiomerically enriched sample of 91.0% ee. Lit.<sup>7</sup>  $[\alpha]_D^{22} -48.6$  (*c* 1, CHCl<sub>3</sub>) for the (*S*)-enantiomer. The enantiomeric purity was determined by HPLC analysis with a chiral column (Chiralpak OD-H column, 1.0 mL/min, 98:2 hexanes:isopropanol, 220 nm,  $t_{\text{minor}} = 22.282$  min,  $t_{\text{major}} = 24.232$  min).

**(S)-4-Trifluoromethyl-1-phenylethanol.**<sup>7</sup> Obtained by oxidative kinetic resolution according to the general procedure with (*S,S*)-**2a**. **Optical Rotation:**  $[\alpha]_D^{22} -32.1$  (*c* 0.993, CHCl<sub>3</sub>) for an enantiomerically enriched sample of >99% ee. Lit.<sup>7</sup>  $[\alpha]_D^{22} -30.2$  (*c* 1.00, CHCl<sub>3</sub>) for the (*S*)-enantiomer. The enantiomeric purity was determined by HPLC analysis with a chiral column

(5) Control experiments carried out under N<sub>2</sub> provide identical results to those carried out in air.

(6) Suzuki, T.; Ghazati, K.; Katoh, T.; Sasai, H. *Org. Lett.* **2009**, *11*, 4286-4288.

(7) Li, W.; Ding, K.; Sandoval, C. A. *Org. Lett.* **2009**, *11*, 907-910

(Chiralpak OJ column, 0.5 mL/min, 99:1 hexanes:isopropanol, 220 nm,  $t_{\text{major}} = 13.1791$  min,  $t_{\text{minor}} = 14.423$  min).

• **Experimental Procedure for Confirmation that Bromide Ion is Oxidized by  $\text{PhI}(\text{OAc})_2$ :**

To a test tube containing potassium bromide (29 mg, 0.25 mmol) and  $\text{PhI}(\text{OAc})_2$  (81 mg, 0.25 mmol) was added  $\text{CH}_2\text{Cl}_2$  (500  $\mu\text{L}$ ) and  $\text{H}_2\text{O}$  (1.0 mL). The mixture turned light brown immediately and darkened to deep orange/brown over a couple minutes indicating the formation of  $\text{Br}_2$ . The mixture was then extracted with  $\text{CH}_2\text{Cl}_2$  (3 x 1 mL) and the volatiles removed under reduced pressure.  $^1\text{H}$  NMR analysis of the residue indicated a 1:1 mixture of  $\text{PhI}(\text{OAc})_2$  and  $\text{PhI}$ .

• **Experimental Procedure for Enantioselective Oxidation with  $\text{HOBr}$  (Table 2, entry 5):**

(Note: all operations carried out in air). To a 5 mL round-bottom flask charged with ( $\pm$ )-1-indanol (33.5 mg, 0.250 mmol), (*S,S*)-Mn-complex **12** (17.0 mg, 0.0250 mmol) and potassium acetate (31.9 mg, 0.325 mmol) was added  $\text{CH}_2\text{Cl}_2$  (500  $\mu\text{L}$ ) and  $\text{H}_2\text{O}$  (400  $\mu\text{L}$ ). The biphasic mixture was allowed to stir for one minute before a solution of  $\text{HOBr}$  (1.12 mL, 0.225 mmol, 0.200 M in  $\text{H}_2\text{O}$ ) was added over 30 min via syringe pump. After 15 minutes the reaction was quenched upon addition of a saturated aqueous solution of  $\text{Na}_2\text{S}_2\text{O}_3$ . The mixture was then extracted with  $\text{Et}_2\text{O}$  (3 x 2 mL) and the combined organic extracts were passed through a short plug of silica gel (3 x 6 cm) eluted with  $\text{Et}_2\text{O}$  (40 mL). The filtrate was concentrated and the residue purified by silica gel column chromatography (5%  $\text{EtOAc}$ /hexanes to 50%  $\text{EtOAc}$ /hexanes, gradient) to afford (*S*)-1-indanol. The enantiomeric purity was determined by HPLC analysis with a chiral column (Chiralpak OD-H column, 1.0 mL/min, 95:5 hexanes:isopropanol, 220 nm,  $t_{\text{minor}} = 8.770$  min,  $t_{\text{major}} = 9.800$  min).

• **Experimental Procedure for Enantioselective Oxidation with  $\text{Br}_2$  or *t*-BuOBr (Table 2, entries 3 and 6):**

(Note: all operations carried out in air). To a 5 mL round-bottom flask charged with ( $\pm$ )-1-indanol (33.4 mg, 0.250 mmol), (*S,S*)-Mn-complex **12** (17.0 mg, 0.0250 mmol) and potassium acetate (49.0 mg, 0.500 mmol) (24.5 mg, 0.250 mmol for *t*-BuOBr) was added  $\text{CH}_2\text{Cl}_2$  (300  $\mu\text{L}$ ) and  $\text{H}_2\text{O}$  (1.0 mL). The biphasic mixture was allowed to stir for one minute before a solution of  $\text{Br}_2$  (9.60  $\mu\text{L}$ , 0.188 mmol) in  $\text{CH}_2\text{Cl}_2$  (200  $\mu\text{L}$ ) (or *t*-BuOBr (23.0  $\mu\text{L}$ , 0.200 mmol) in  $\text{CH}_2\text{Cl}_2$  (200  $\mu\text{L}$ )) was added over 30 min via syringe pump. After 15 minutes the reaction was quenched upon addition of a saturated aqueous solution of  $\text{Na}_2\text{S}_2\text{O}_3$ . The mixture was then extracted with  $\text{Et}_2\text{O}$  (3 x 2 mL) and the combined organic extracts were passed through a short plug of silica gel (3 x 6 cm) eluted with  $\text{Et}_2\text{O}$  (40 mL). The filtrate was concentrated and the residue purified by silica gel column chromatography (5%  $\text{EtOAc}$ /hexanes to 50%  $\text{EtOAc}$ /hexanes, gradient) to afford (*S*)-1-indanol. The enantiomeric purity was determined by HPLC analysis with a chiral column (Chiralpak OD-H column, 1.0 mL/min, 95:5 hexanes:isopropanol, 220 nm,  $t_{\text{minor}} = 8.770$  min,  $t_{\text{major}} = 9.800$  min).

**Table S1.** Additional Data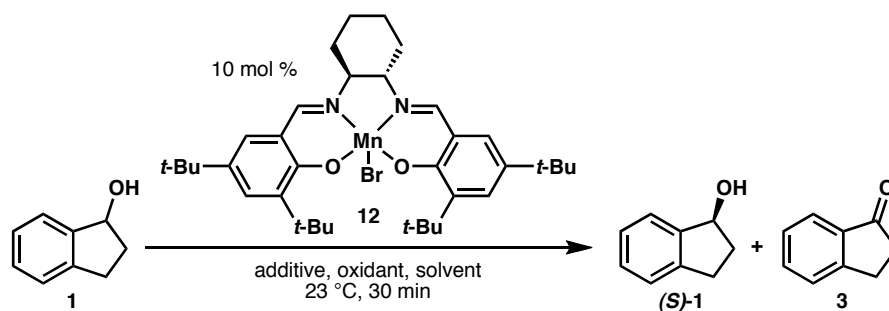

| entry | solvent                                                 | additive                                 | oxidant                      | addition time | conv (%) <sup>a</sup> | ee (%) <sup>b</sup> | <i>k</i> <sub>rel</sub> <sup>c</sup> |
|-------|---------------------------------------------------------|------------------------------------------|------------------------------|---------------|-----------------------|---------------------|--------------------------------------|
| 1     | CH <sub>2</sub> Cl <sub>2</sub> :H <sub>2</sub> O (1:2) | --                                       | Br <sub>2</sub> (0.75 equiv) | 1 min         | -- <sup>d</sup>       | <5                  | 1.0                                  |
| 2     | CH <sub>2</sub> Cl <sub>2</sub> :H <sub>2</sub> O (1:2) | 2.0 equiv KOAc                           | Br <sub>2</sub> (0.75 equiv) | 5 min         | 71                    | 75                  | 3.9                                  |
| 3     | CH <sub>2</sub> Cl <sub>2</sub> :H <sub>2</sub> O (1:2) | 2.0 equiv KOAc                           | Br <sub>2</sub> (0.75 equiv) | 30 min        | 65                    | 98                  | 14                                   |
| 4     | CH <sub>2</sub> Cl <sub>2</sub> :H <sub>2</sub> O (1:2) | 10.0 equiv KOAc                          | Br <sub>2</sub> (0.75 equiv) | 30 min        | 54                    | 72                  | 8.8                                  |
| 5     | CH <sub>2</sub> Cl <sub>2</sub>                         | 2.0 equiv <i>n</i> -Bu <sub>4</sub> NOAc | Br <sub>2</sub> (0.75 equiv) | 30 min        | 27                    | <5                  | 1.0                                  |
| 6     | CH <sub>2</sub> Cl <sub>2</sub> :H <sub>2</sub> O (1:2) | --                                       | HOBr (0.70 equiv)            | 5 min         | -- <sup>d</sup>       | <5                  | 1.0                                  |
| 7     | CH <sub>2</sub> Cl <sub>2</sub> :H <sub>2</sub> O (1:2) | 1.3 equiv KOAc                           | HOBr (0.90 equiv)            | 30 min        | 69                    | 97                  | 9.5                                  |
| 8     | CH <sub>2</sub> Cl <sub>2</sub> :H <sub>2</sub> O (1:2) | 1.0 equiv KOAc                           | <i>t</i> -BuOBr (0.80 equiv) | 5 min         | 71                    | 98                  | 9.2                                  |
| 9     | CH <sub>2</sub> Cl <sub>2</sub> :H <sub>2</sub> O (1:2) | 1.0 equiv KOAc                           | <i>t</i> -BuOBr (0.80 equiv) | 30 min        | 66                    | 98                  | 13                                   |
| 10    | CH <sub>2</sub> Cl <sub>2</sub>                         | 10.0 equiv KOAc                          | <i>t</i> -BuOBr (0.80 equiv) | 30 min        | 59                    | 32                  | 2.1                                  |
| 11    | CH <sub>2</sub> Cl <sub>2</sub> :H <sub>2</sub> O (1:2) | 1.0 equiv <i>n</i> -Bu <sub>4</sub> NOAc | <i>t</i> -BuOBr (0.80 equiv) | 30 min        | 45                    | 43                  | 4.8                                  |

<sup>a</sup> Determined by <sup>1</sup>H NMR (500 MHz) analysis of the unpurified reaction mixtures. <sup>b</sup> Determined by HPLC analysis with a chiral column. <sup>c</sup> *k*<sub>rel</sub> = ln[(1-conv)(1-ee)]/ln[(1-conv)(1+ee)]. <sup>d</sup> Unpurified reaction mixture is complex as judged by <sup>1</sup>H NMR (500 MHz) analysis.

**Scheme S1.** Reactions with PhIO and *m*-CPBA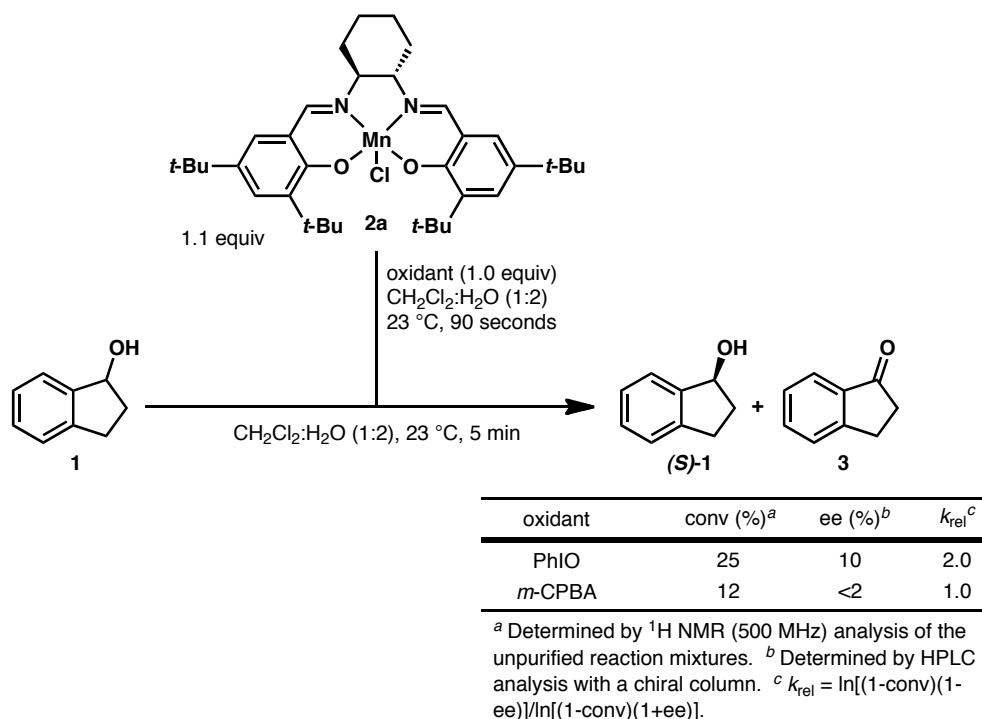**•Experimental Procedure for Enantioselective Oxidation with Stoichiometric Quantities of Mn-Cl Complex 2a and PhIO (Scheme S1).**

(Note: all operations carried out in air). To a 5 mL round-bottom flask charged with PhIO (11 mg, 0.050 mmol) and CH<sub>2</sub>Cl<sub>2</sub> (400 μL) and H<sub>2</sub>O (1.0 mL) was added (*S,S*)-Mn-complex **2a** (35 mg, 0.055 mmol). The black, biphasic mixture was allowed to stir for 90 seconds before (±)-1-indanol (6.7 mg, 0.050 mmol) was added as a solution in CH<sub>2</sub>Cl<sub>2</sub> (100 μL). The mixture remained dark black throughout the reaction. After the mixture was allowed to stir for five minutes the reaction was quenched upon addition of a saturated aqueous solution of Na<sub>2</sub>S<sub>2</sub>O<sub>3</sub>. The mixture was then extracted with Et<sub>2</sub>O (3 x 2 mL) and the combined organic extracts were passed through a short plug of silica gel (3 x 6 cm) eluted with Et<sub>2</sub>O (40 mL). The filtrate was concentrated and the residue purified by silica gel column chromatography (5% EtOAc/hexanes to 50% EtOAc/hexanes, gradient) to afford 1-indanol. The enantiomeric purity was determined by HPLC analysis with a chiral column (Chiralpak OD-H column, 1.0 mL/min, 95:5 hexanes:isopropanol, 220 nm, *t*<sub>minor</sub> = 8.770 min, *t*<sub>major</sub> = 9.800 min).

**•Experimental Procedure for Enantioselective Oxidation with Stoichiometric Quantities of Mn-Cl Complex 2a and *m*-CPBA (Scheme S1).**

(Note: all operations carried out in air). To a 5 mL round-bottom flask charged with (*S,S*)-Mn-complex **2a** (35 mg, 0.055 mmol) and CH<sub>2</sub>Cl<sub>2</sub> (300 μL) and H<sub>2</sub>O (1.0 mL) was added *m*-CPBA (8.6 mg, 0.050 mmol) as a solution in CH<sub>2</sub>Cl<sub>2</sub> (100 μL). The dark green/brown, biphasic mixture was allowed to stir for 90 seconds before (±)-1-indanol (6.7 mg, 0.050 mmol) was added as a

solution in  $\text{CH}_2\text{Cl}_2$  (100  $\mu\text{L}$ ). The mixture remained dark green/brown throughout the reaction. After the mixture was allowed to stir for five minutes the reaction was quenched upon addition of a saturated aqueous solution of  $\text{Na}_2\text{S}_2\text{O}_3$ . The mixture was then extracted with  $\text{Et}_2\text{O}$  (3 x 2 mL) and the combined organic extracts were passed through a short plug of silica gel (3 x 6 cm) eluted with  $\text{Et}_2\text{O}$  (40 mL). The filtrate was concentrated and the residue purified by silica gel column chromatography (5%  $\text{EtOAc}$ /hexanes to 50%  $\text{EtOAc}$ /hexanes, gradient) to afford 1-indanol. The enantiomeric purity was determined by HPLC analysis with a chiral column (Chiralpak OD-H column, 1.0 mL/min, 95:5 hexanes:isopropanol, 220 nm,  $t_{\text{minor}} = 8.770$  min,  $t_{\text{major}} = 9.800$  min).

**•Experimental Procedures for Determination of the Kinetic Isotope Effect:**

Rate analysis of the kinetic resolution of 1-indanol and 1-D(1)-indanol reported by Xia and coworkers is complicated by the fact that  $k_{\text{rel}}$  changes as a function of time for the oxidation of ( $\pm$ )-1-indanol (Figure S1). This complicates the measurements for determining  $k_{\text{H}}/k_{\text{D}}$  by using the method of initial rates as the reaction in the initial stages is not descriptive of the entire reaction, even if enantiomerically pure substrate is used.

The data presented in Figure S1 was acquired by analysis of small aliquots removed over the course of a reaction. The reaction (7.5 mmol of ( $\pm$ )-1-indanol) was carried out under conditions analogous to those described in the general procedure for oxidative kinetic resolution (see above). The aliquots, once removed, were quenched immediately upon addition to a test tube containing sodium thiosulfate (aq) (1 mL), sodium bicarbonate (aq) (1 mL), diethyl ether (1 mL) and dimethyl sulfide (100  $\mu\text{L}$ ). The mixture was then extracted with  $\text{Et}_2\text{O}$  (3 x 1 mL) and the combined organic phases were passed through a short plug of silica gel (3 x 0.5 cm) eluted with  $\text{Et}_2\text{O}$  (~8 mL). The volatiles were removed under reduced pressure and the conversion measured by  $^1\text{H}$  NMR (500 MHz) analysis and the enantiomeric excess determined by HPLC analysis with a chiral column.

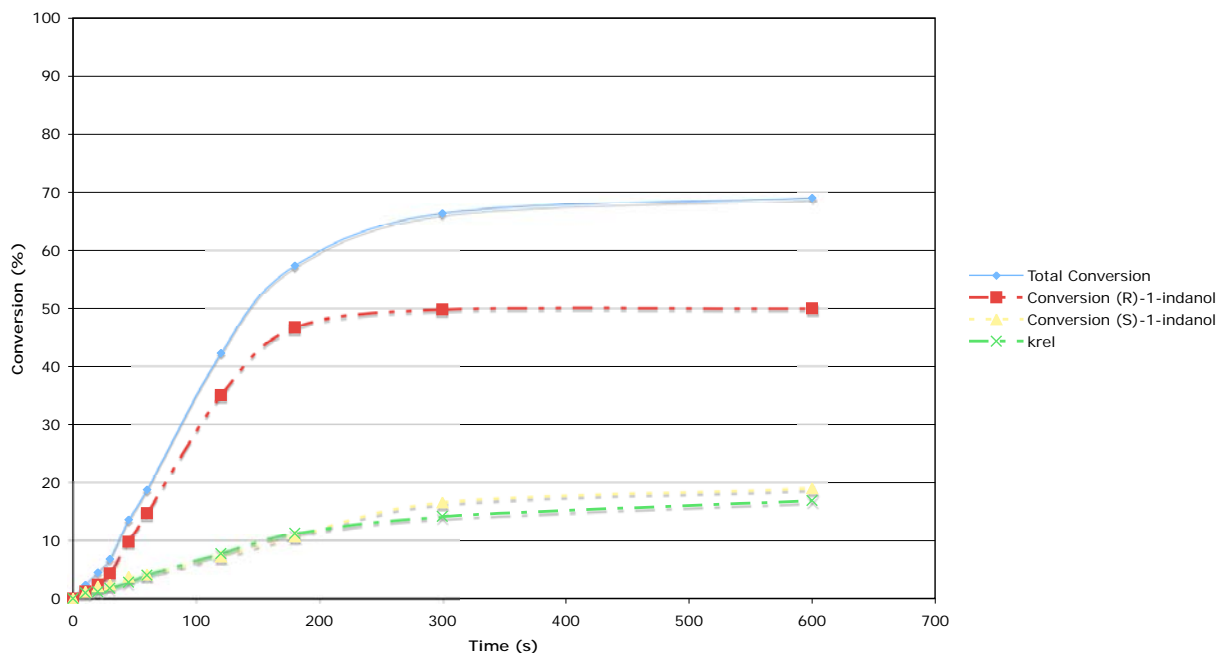

**Figure S1.** Conversion vs. Time

Reactions in which Mn-salen complex **12** (1.1 equiv) is first oxidized with *t*-BuOBr (1.0 equiv) followed by the addition of (±)-1-indanol (1.0 equiv), however, have a constant selectivity factor ( $k_{\text{rel}}$ ) over time (Scheme S2). The kinetic isotope effect for this reaction was determined by initial rate analysis of an internal competition reaction between (*S*)-1-indanol and (*S*)-(D1)-1-indanol with (*R,R*)-salen-Mn complex **12** (run in triplicate). Enantiomerically pure substrates were used to simplify analysis and to gain greater insight into the nature of the transition state that predominates the catalytic cycle (i.e. the enantiomer of alcohol that undergoes reaction more readily). The conversions for each run were as follows: Run 1. (*S*)-(D1)-1-indanol: 8.5% conv, (*S*)-1-indanol 28.5% conv:  $k_{\text{H}}/k_{\text{D}} = 3.3$ . Run 2. (*S*)-(D1)-1-indanol: 13.5% conv, (*S*)-1-indanol 28.5% conv:  $k_{\text{H}}/k_{\text{D}} = 2.1$ . Run 3. (*S*)-(D1)-1-indanol: 8.0% conv, (*S*)-1-indanol 22.5% conv:  $k_{\text{H}}/k_{\text{D}} = 2.8$ . Average of the three runs is  $2.7 \pm 0.6$

The reactions were carried out according to the general procedure with stoichiometric quantities of Mn-complex **12** (see below) with several adjustments: (1) before 1-indanol was added, the mixtures were allowed to cool to 0 °C, (2) the reactions were quenched upon addition of dimethyl sulfide (100 µL) and a saturated aqueous solution of sodium thiosulfate (1 mL), (3) after the addition of 1-indanol the reactions were quenched after 15 seconds. Conversions were determined by <sup>1</sup>H NMR (600 MHz) analysis against an internal standard of the unpurified reaction mixtures.



**Scheme S2.** Oxidation with Stoichiometric Quantities of Mn-Complex **12**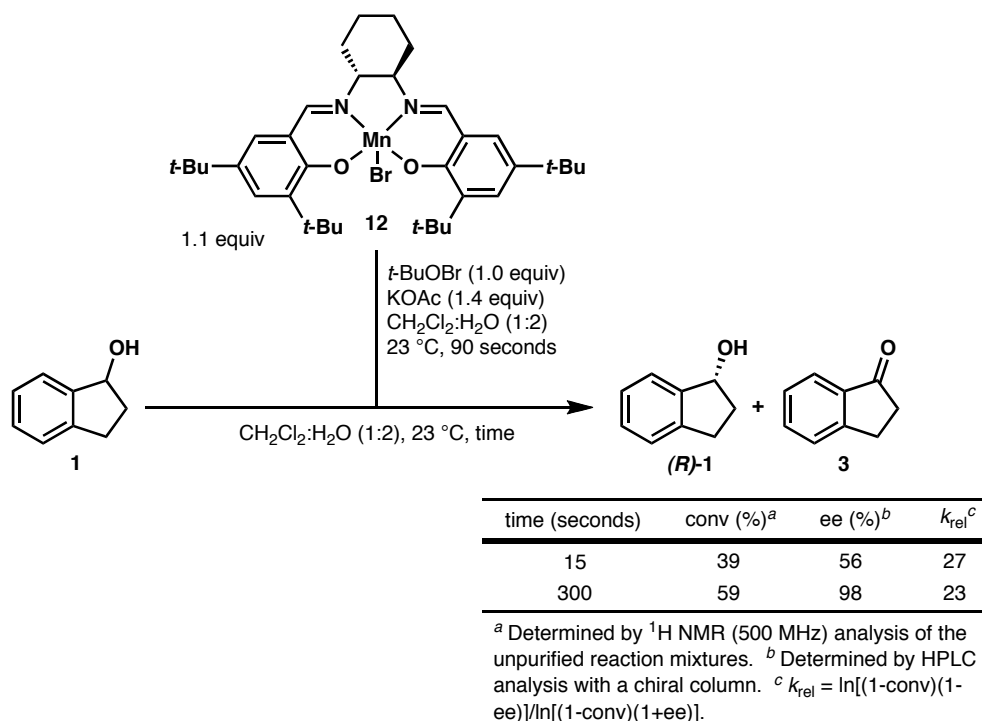**•Representative Experimental Procedure for Enantioselective Oxidation with Stoichiometric Quantities of Mn-Br Complex **12** and *t*-BuOBr (Scheme S2).**

(Note: all operations carried out in air). To a 5 mL round-bottom flask charged with (*R,R*)-Mn-complex **12** (37.3 mg, 0.0550 mmol) was added  $\text{CH}_2\text{Cl}_2$  (500  $\mu\text{L}$ ),  $\text{H}_2\text{O}$  (1.0 mL) and potassium acetate (2.50 M aq, 20.0  $\mu\text{L}$ , 0.0500 mmol). The biphasic mixture was allowed to stir for one minute before *t*-BuOBr (5.7  $\mu\text{L}$ , 0.050 mmol) as a solution in  $\text{CH}_2\text{Cl}_2$  (200  $\mu\text{L}$ ) was added. Immediately after the addition of oxidant the mixture turned from deep brown to dark black. After 90 seconds, ( $\pm$ )-1-indanol (6.7 mg, 0.050 mmol) was added as a solution in  $\text{CH}_2\text{Cl}_2$  (100  $\mu\text{L}$ ). Within a couple minutes after the addition of 1-indanol the mixture turned from dark black to deep brown. After the mixture was allowed to stir for five minutes the reaction was quenched upon addition of a saturated aqueous solution of  $\text{Na}_2\text{S}_2\text{O}_3$ . The mixture was then extracted with  $\text{Et}_2\text{O}$  (3 x 2 mL) and the combined organic extracts were passed through a short plug of silica gel (3 x 6 cm) eluted with  $\text{Et}_2\text{O}$  (40 mL). The filtrate was concentrated and the residue purified by silica gel column chromatography (5%  $\text{EtOAc}$ /hexanes to 50%  $\text{EtOAc}$ /hexanes, gradient) to afford (*R*)-1-indanol. The enantiomeric purity was determined by HPLC analysis with a chiral column (Chiralpak OD-H column, 1.0 mL/min, 95:5 hexanes:isopropanol, 220 nm,  $t_{\text{minor}} = 8.770$  min,  $t_{\text{major}} = 9.800$  min).

**•Determination of the amount of acetate or bicarbonate present in  $\text{CH}_2\text{Cl}_2$ :**

1) A mixture of KOAc (1.47g, 15.0 mmol) and AcOH (858  $\mu\text{L}$ , 15.0 mmol),  $\text{H}_2\text{O}$  (60 mL) and  $\text{CH}_2\text{Cl}_2$  (30 mL) was allowed to stir for 15 min. The organic layer was separated and filtered.

An infrared spectrum was taken of the organic phase, which showed no acetate to be present and a small peak corresponding to acetic acid. The mixture was concentrated under reduced pressure to reveal no residue (<1 mg).

2) A mixture of KOAc (1.47g, 15.0 mmol), H<sub>2</sub>O (60 mL) and CH<sub>2</sub>Cl<sub>2</sub> (30 mL) was allowed to stir for 15 min. The organic layer was separated and filtered. An infrared spectrum was taken of the organic phase, which showed no acetate to be present. The mixture was concentrated under reduced pressure to reveal no residue (<1 mg).

3) A mixture of NaHCO<sub>3</sub> (1.26g, 15.0 mmol), H<sub>2</sub>O (60 mL) and CH<sub>2</sub>Cl<sub>2</sub> (30 mL) was allowed to stir for 15 min. The organic layer was separated and filtered. The mixture was concentrated under reduced pressure to reveal no residue (<1 mg).

**Scheme S3.** Reaction of Indene with Stoichiometric Quantities of Mn-Complex **12** and *t*-BuOBr

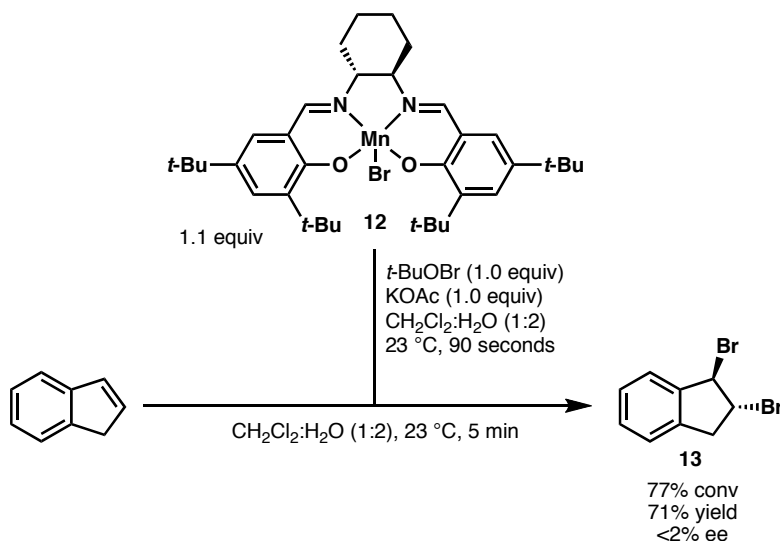

• **Experimental Procedure for Reaction of Indene with Stoichiometric Quantities of Mn-Br Complex **12** and *t*-BuOBr (Scheme S3).** (Note: all operations carried out in air). To a 5 mL round-bottom flask charged with (*R,R*)-Mn-complex **12** (37.3 mg, 0.0550 mmol) was added CH<sub>2</sub>Cl<sub>2</sub> (500 μL), H<sub>2</sub>O (1.0 mL) and potassium acetate (2.50 M aq, 20.0 μL, 0.0500 mmol). The biphasic mixture was allowed to stir for one minute before *t*-BuOBr (5.7 μL, 0.050 mmol) as a solution in CH<sub>2</sub>Cl<sub>2</sub> (200 μL) was added. Immediately after the addition of oxidant the mixture turned from deep brown to dark black. After 90 seconds, indene (5.8 mg, 0.050 mmol) was added as a solution in CH<sub>2</sub>Cl<sub>2</sub> (100 μL). Within one minute after the addition of indene the mixture turned from dark black to deep brown. After the mixture was allowed to stir for five minutes the reaction was quenched upon addition of a saturated aqueous solution of Na<sub>2</sub>S<sub>2</sub>O<sub>3</sub>. The mixture was then extracted with Et<sub>2</sub>O (3 x 2 mL) and the combined organic extracts were passed through a short plug of silica gel (3 x 6 cm) eluted with Et<sub>2</sub>O (40 mL). The filtrate was

concentrated and the residue purified by silica gel column chromatography (hexanes to 10% EtOAc/hexanes, gradient) to afford *trans*-1,2-dibromoindane<sup>8</sup> (9.9 mg, 0.036 mmol, 71% yield). The enantiomeric purity was determined to be racemic by HPLC analysis with a chiral column (Chiralpak OD-H column, 1.0 mL/min, 99:1 hexanes:isopropanol, 220 nm,  $t_{\text{minor}} = 5.026$  min,  $t_{\text{major}} = 5.532$  min). (Note: <2% epoxide was detected in the crude reaction mixture by <sup>1</sup>H NMR (500 MHz) analysis.)

Scheme S4

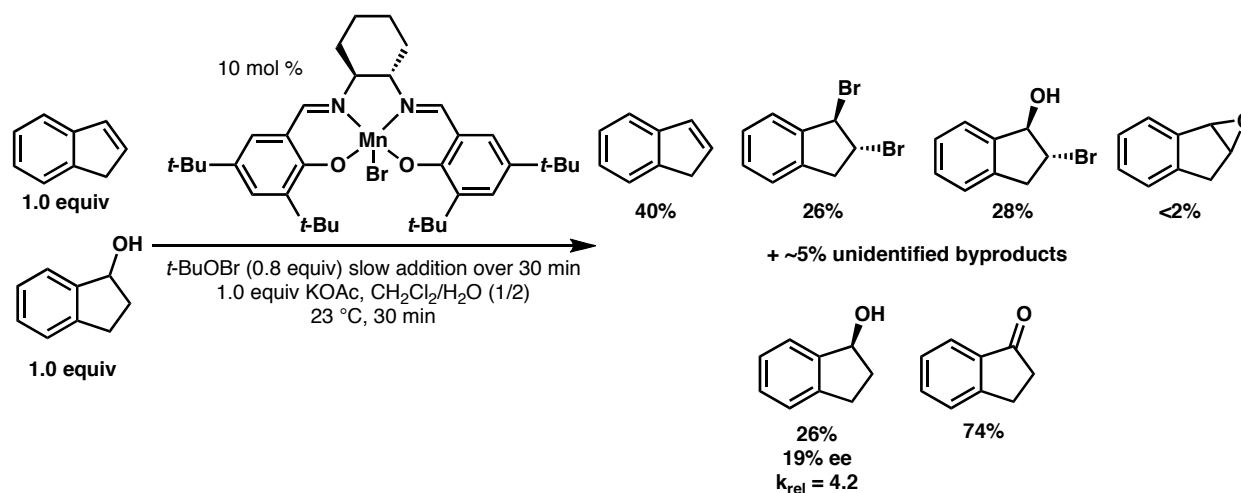

• **Experimental Procedure for Reaction of Indene and Indanol with Catalytic Quantities of Mn-Br Complex **12** and *t*-BuOBr (Scheme S4).** (Note: all operations carried out in air). To a 25 mL round-bottom flask charged with (±)-1-indanol (134 mg, 1.00 mmol), indene (117 μg, 1.00 mmol), (*S,S*)-Mn-complex **12** (67.8 mg, 0.100 mmol) and potassium acetate (98.2 mg, 1.00 mmol) was added CH<sub>2</sub>Cl<sub>2</sub> (2.0 mL) and H<sub>2</sub>O (2.0 mL). The biphasic mixture was allowed to stir for one minute before a solution of *t*-BuOBr (92.0 μL, 0.800 mmol) in H<sub>2</sub>O (2.0 mL) was added over 30 min via syringe pump. After 15 minutes the reaction was quenched upon addition of a saturated aqueous solution of Na<sub>2</sub>S<sub>2</sub>O<sub>3</sub>. The mixture was then extracted with Et<sub>2</sub>O (3 x 2 mL) and the combined organic extracts were passed through a short plug of silica gel (3 x 6 cm) eluted with Et<sub>2</sub>O (100 mL). The filtrate was carefully concentrated and the unpurified reaction mixture analyzed by <sup>1</sup>H NMR (500 MHz) spectroscopy to determine the relative amounts of the reaction products (NMR yields presented, determined by analysis with an internal standard).

(8) Tutar, A.; Cakmak, O.; Balci, M. *J. Chem. Res.* **2006**, 507-511. We have found that the <sup>1</sup>H NMR chemical shifts of *trans*-1,2-dibromoindane are slightly different to those reported. In all cases the chemical shifts are ~0.1 ppm downfield from the reported values. <sup>1</sup>H NMR (500 MHz, CDCl<sub>3</sub>): 7.50-7.49 (1H, m), 7.38-7.32 (3H, m), 5.65 (1H, s), 4.90 (1H, d,  $J = 5.0$  Hz), 3.84 (1H, dd,  $J = 17.5, 5.5$  Hz), 3.29 (1H, d,  $J = 17.5$  Hz). <sup>13</sup>C NMR data is in good agreement with the reported values.

The residue was purified by silica gel column chromatography (5% Et<sub>2</sub>O/hexanes to 50% Et<sub>2</sub>O/hexanes, gradient) to isolate *trans*-1,2-dibromoindane,<sup>8</sup> *trans*-2-bromoindan-1-ol,<sup>9</sup> 1-indanol, indene and 1-indanone. The enantiomeric purity of (*S*)-1-indanol was determined by HPLC analysis with a chiral column (Chiralpak OD-H column, 1.0 mL/min, 95:5 hexanes:isopropanol, 220 nm,  $t_{\text{minor}} = 8.770$  min,  $t_{\text{major}} = 9.800$  min). (Note: <2% epoxide was detected in the crude reaction mixture by <sup>1</sup>H NMR (500 MHz) analysis.)

### Scheme S5

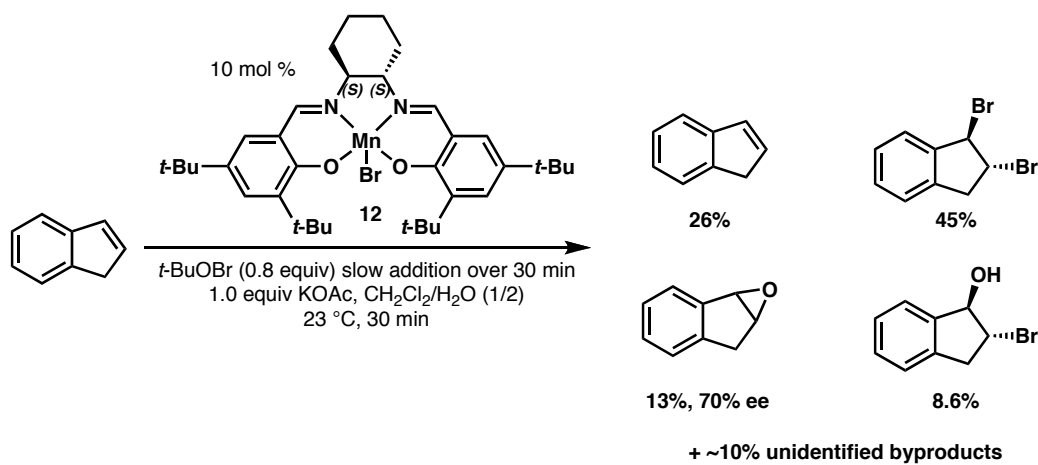

• **Experimental Procedure for Reaction of Indene with Catalytic Quantities of Mn-Br Complex **12** and *t*-BuOBr (Scheme S5).** (Note: all operations carried out in air). To a 25 mL round-bottom flask charged with indene (117 μg, 1.00 mmol), (*S,S*)-Mn-complex **12** (67.8 mg, 0.100 mmol) and potassium acetate (98.2 mg, 1.00 mmol) was added CH<sub>2</sub>Cl<sub>2</sub> (2.0 mL) and H<sub>2</sub>O (2.0 mL). The biphasic mixture was allowed to stir for one minute before a solution of *t*-BuOBr (92.0 μL, 0.800 mmol) in H<sub>2</sub>O (2.0 mL) was added over 30 min via syringe pump. After 15 minutes the reaction was quenched upon addition of a saturated aqueous solution of Na<sub>2</sub>S<sub>2</sub>O<sub>3</sub>. The mixture was then extracted with Et<sub>2</sub>O (3 x 2 mL) and the combined organic extracts were passed through a short plug of silica gel (3 x 6 cm) eluted with Et<sub>2</sub>O (100 mL). The filtrate was carefully concentrated and the unpurified reaction mixture analyzed by <sup>1</sup>H NMR (500 MHz) spectroscopy to determine the relative amounts of the reaction products (NMR yields presented, determined by analysis with an internal standard). The residue was purified by silica gel column chromatography (5% Et<sub>2</sub>O/hexanes to 50% Et<sub>2</sub>O/hexanes, gradient) to isolate *trans*-1,2-dibromoindane,<sup>8</sup> *trans*-2-bromoindan-1-ol,<sup>9</sup> indene oxide<sup>9</sup> and indene. The enantiomeric purity

(9) For characterization data of indene oxide and *trans*-2-bromoindan-1-ol, see: Palmer, M. J.; Kenny, J. A.; Walsgrove, T.; Kawamoto, A. M.; Willis, M. J. *Chem. Soc., Perkin. Trans. 1*, **2002**, 416-427.

of indene oxide was determined by HPLC analysis with a chiral column (Chiralpak OJ column, 1.0 mL/min, 98:2 hexanes:isopropanol, 220 nm,  $t_{\text{minor}} = 14.420$  min,  $t_{\text{major}} = 16.853$  min).<sup>10</sup>

### Scheme S6

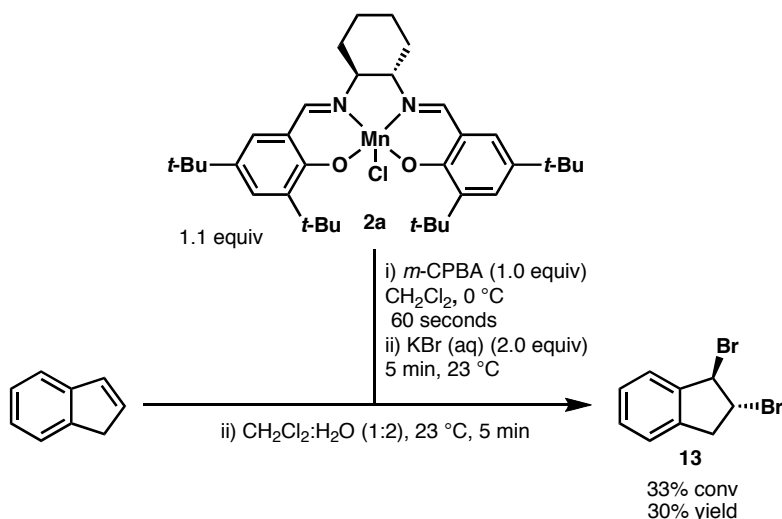

• **Experimental Procedure for the reaction shown in Scheme S6.** (Note: all operations carried out in air). To a 5 mL round-bottom flask charged with (*S,S*)-Mn-complex **2a** (34.7 mg, 0.0550 mmol) was added CH<sub>2</sub>Cl<sub>2</sub> (300  $\mu$ L). The mixture was allowed to cool to 0 °C before *m*-CPBA (8.60 mg, 0.0500 mmol) was added as a solution in CH<sub>2</sub>Cl<sub>2</sub> (100  $\mu$ L). The mixture turns from deep brown to deep green upon addition of *m*-CPBA. After 90 seconds potassium bromide (11.9 mg, 0.100 mmol) was added as a solution in H<sub>2</sub>O (1.0 mL). The biphasic mixture was allowed to warm to 23 °C and stir for five minutes before indene (5.8 mg, 0.050 mmol) was added as a solution in CH<sub>2</sub>Cl<sub>2</sub> (100  $\mu$ L). After the mixture was allowed to stir for five minutes the reaction was quenched upon addition of a saturated aqueous solution of Na<sub>2</sub>S<sub>2</sub>O<sub>3</sub>. The mixture was then extracted with Et<sub>2</sub>O (3 x 2 mL) and the combined organic extracts were passed through a short plug of silica gel (3 x 6 cm) eluted with Et<sub>2</sub>O (40 mL). The filtrate was concentrated and the residue purified by silica gel column chromatography (hexanes to 10% EtOAc/hexanes, gradient) to afford *trans*-1,2-dibromoindane<sup>8</sup> (4.1 mg, 0.015 mmol, 30% yield). (Note: <2% epoxide was detected in the crude reaction mixture by <sup>1</sup>H NMR (500 MHz) analysis.)

(10) The slight discrepancy observed in that the total amount of oxidation products exceeds the total amount of *t*-BuOBr added is likely due to small quantities of Br<sub>2</sub> present in the *t*-BuOBr mixture.

Table S2. Additional Data

| entry | $R_1$           | $R_2$           | catalyst  | conv (%) <sup>a</sup> | ee (%) <sup>b</sup> | $k_{rel}$ <sup>c</sup> |
|-------|-----------------|-----------------|-----------|-----------------------|---------------------|------------------------|
| 1     | <i>t</i> -Bu    | <i>t</i> -Bu    | <b>2a</b> | 68                    | >99                 | >13                    |
| 2     | <i>t</i> -Bu    | CH <sub>3</sub> | <b>2b</b> | 65                    | 34                  | 1.9                    |
| 3     | <i>t</i> -Bu    | H               | <b>2c</b> | 67                    | 50                  | 2.6                    |
| 4     | NO <sub>2</sub> | <i>t</i> -Bu    | <b>2d</b> | 68                    | 26                  | 1.6                    |
| 5     | OMe             | <i>t</i> -Bu    | <b>2e</b> | 61                    | 81                  | 7.5                    |
| 6     | Me              | <i>t</i> -Bu    | <b>2f</b> | 63                    | 94                  | 11                     |

<sup>a</sup> Determined by <sup>1</sup>H NMR (500 MHz) analysis of the unpurified reaction mixtures. <sup>b</sup> Determined by HPLC analysis with a chiral column. <sup>c</sup>  $k_{rel} = \ln[(1-\text{conv})(1-\text{ee})]/\ln[(1-\text{conv})(1+\text{ee})]$ .

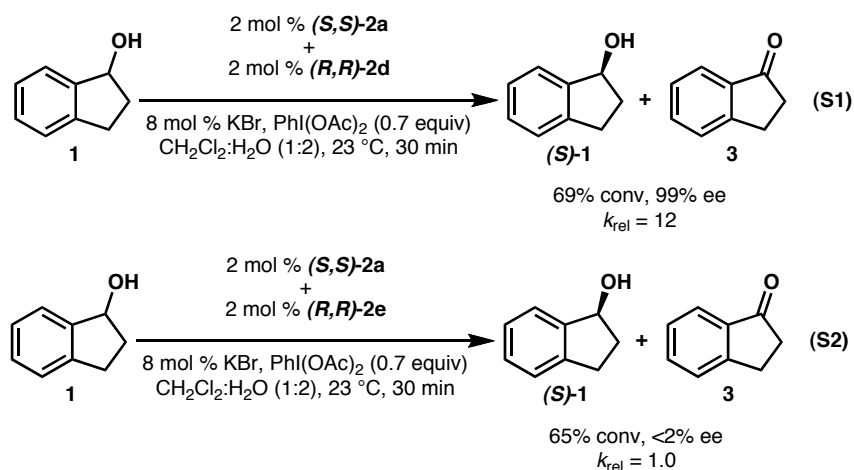

• The reactions illustrated in eqns (S1) and (S2) were carried out according to the general procedure for enantioselective oxidation with the exception that two different Mn-complexes were employed in the same reaction flask.

• To confirm that the result presented in eqn (S1) is valid, independent rate measurements for both catalysts (*S,S*)-**2a** and (*S,S*)-**2d** with (*R*)-1-indanol were carried out (Table 3). The conclusions derived from this data are in full accord with the results presented in eqn (S1). The data presented in Table 3 was acquired by analysis of small aliquots removed over the course of a reaction. The reaction was carried out under conditions analogous to those described in the general procedure for oxidative kinetic resolution (see above). The aliquots, once removed, were quenched immediately upon addition to a test tube containing sodium thiosulfate (aq) (1 mL),

sodium bicarbonate (aq) (1 mL), diethyl ether (1 mL) and dimethyl sulfide (100  $\mu$ L). The mixture was then extracted with Et<sub>2</sub>O (3 x 1 mL) and the combined organic phases were passed through a short plug of silica gel (3 x 0.5 cm) eluted with Et<sub>2</sub>O (~8 mL). The volatiles were removed under reduced pressure and the conversion measured by <sup>1</sup>H NMR (500 MHz) analysis.

**Table 3.** Comparison of Rates for Catalyst **2a** and **2d**

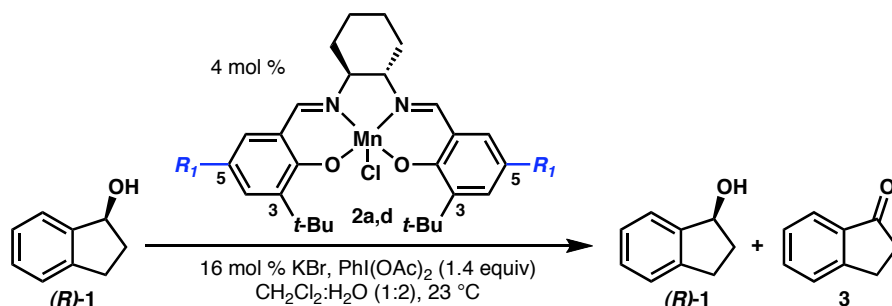

| entry | R <sub>1</sub>  | catalyst  | time (min) | conv (%) <sup>a</sup> |
|-------|-----------------|-----------|------------|-----------------------|
| 1     | <i>t</i> -Bu    | <b>2a</b> | 1.0        | 46                    |
| 2     | <i>t</i> -Bu    | <b>2a</b> | 2.0        | 93                    |
| 3     | <i>t</i> -Bu    | <b>2a</b> | 3.0        | >98                   |
| 4     | NO <sub>2</sub> | <b>2d</b> | 1.0        | 27                    |
| 5     | NO <sub>2</sub> | <b>2d</b> | 2.0        | 55                    |
| 6     | NO <sub>2</sub> | <b>2d</b> | 3.0        | 71                    |
| 7     | NO <sub>2</sub> | <b>2d</b> | 5.0        | 98                    |

<sup>a</sup> Determined by <sup>1</sup>H NMR (500 MHz) analysis of the unpurified reaction mixtures.

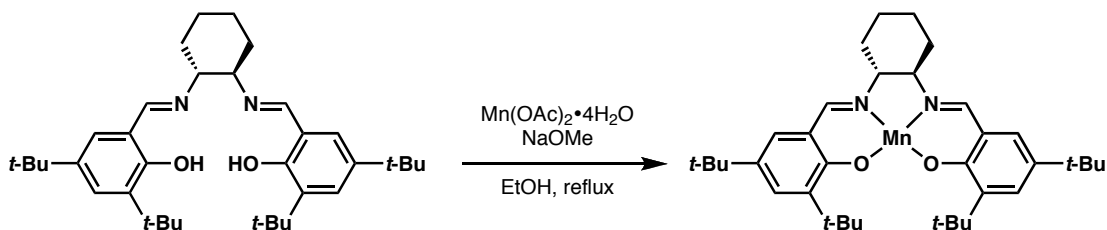

#### • Experimental Procedure for Synthesis of Mn(II)-Salen complex:

(Note: All operations carried out to *exclude* air.<sup>11</sup>) To a three-neck flask equipped with stir-bar and reflux condenser was added the salen ligand (409 mg, 0.750 mmol). The whole apparatus was evacuated and backfilled with argon 3x. Degassed EtOH (60 mL) followed by NaOMe in degassed MeOH (3.0 mL, 1.5 mmol, 0.50 M in MeOH) were then added and the suspension heated to reflux. Once the solids had dissolved, a solution of Mn(OAc)<sub>2</sub>•4H<sub>2</sub>O (735 mg, 3.00

(11) Water, EtOH and MeOH were deoxygenated by bubbling argon through the liquid for several hours prior to use.

mmol) in H<sub>2</sub>O/EtOH (5 mL) was added (the mixture turned from yellow to red). The mixture was allowed to reflux for 90 minutes. At this time the mixture was allowed to cool to 22 °C (the mixture turns from red to brown). The volatiles were removed under reduced pressure (~0.1 mmHg) to afford a brown solid. Dichloromethane (20 mL) was added to the residue and the suspension filtered. The mother liquor was concentrated under reduced pressure (~0.1 mmHg) to provide the Mn(II)-salen complex as a light yellow/brown solid (300 mg, 0.50 mmol, 66% yield).

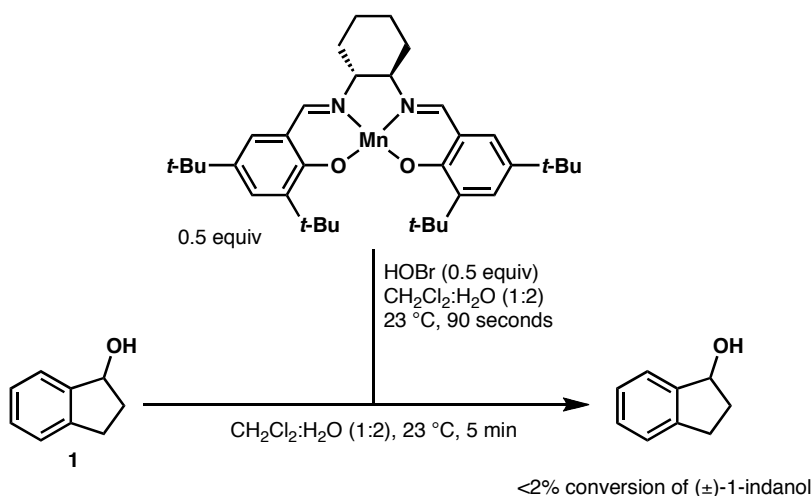

• **Experimental Procedure for Attempted Oxidation with Mn(II)-Salen complex:**

(Note: All operations carried out to exclude air.) To a round-bottom flask equipped with a stir bar under argon was added the Mn(II)-salen complex (15 mg, 0.025 mmol) as a solution in CH<sub>2</sub>Cl<sub>2</sub> (400 µL). Deoxygenated H<sub>2</sub>O (750 µL) was added followed by an aqueous solution of hypobromous acid (250 µL, 0.025 mmol, 0.10 M in deoxygenated H<sub>2</sub>O). The brown mixture was allowed to stir for 90 seconds before (±)-1-indanol (6.7 mg, 0.050 mmol) was added as a solution in CH<sub>2</sub>Cl<sub>2</sub> (100 µL). After the mixture was allowed to stir for five minutes the reaction was quenched upon addition of a saturated aqueous solution of Na<sub>2</sub>S<sub>2</sub>O<sub>3</sub>. The mixture was then extracted with Et<sub>2</sub>O (3 x 2 mL) and the combined organic extracts were passed through a short plug of silica gel (3 x 6 cm) eluted with Et<sub>2</sub>O (40 mL). The filtrate was then concentrated to afford a clear oil. <sup>1</sup>H NMR analysis of the unpurified reaction mixture indicates <2% conversion to 1-indanone.



# X-ray Crystallographic Laboratory

Harvard University

Structure Report

Shao-Liang Zheng

Project Name: Brown101

Date: 01-27-2010

Prof. Corey

**X-Ray Crystallography:** A crystal mounted on a diffractometer was collected data at 100 K. The intensities of the reflections were collected by means of a Bruker APEX II CCD diffractometer ( $\text{Mo}_{\text{K}\alpha}$  radiation,  $\lambda=0.71073 \text{ \AA}$ ), and equipped with an Oxford Cryosystems nitrogen flow apparatus. The collection method involved  $0.5^\circ$  scans in  $\omega$  at  $28^\circ$  in  $2\theta$ . Data integration down to  $0.77 \text{ \AA}$  resolution was carried out using SAINT V7.46 A (Bruker diffractometer, 2009) with reflection spot size optimization. Absorption corrections were made with the program SADABS (Bruker diffractometer, 2009). The structure was solved by the direct methods procedure and refined by least-squares methods against  $F^2$  using SHELXS-97 and SHELXL-97 (Sheldrick, 2008). Non-hydrogen atoms were refined anisotropically, and hydrogen atoms were allowed to ride on the respective atoms. Crystal data as well as details of data collection and refinement are summarized in Table 1, geometric parameters are shown in Table 2, and hydrogen-bond parameters are listed in Table 3. The Ortep plots produced with SHELXL-97 program, and the other drawings were produced with Accelrys DS Visualizer 2.0 (Accelrys, 2007).

**NOTE:** C8/C13 and C58/C63 in the cyclohexane rings should be ONLY in S configuration. In that case, we use P1 space group to refine the structure rather than using the disorder model and refine it as a higher symmetry space group: P-1.

**Table 1. Experimental details**

|                                      |                                                                                          |
|--------------------------------------|------------------------------------------------------------------------------------------|
|                                      | Brown101                                                                                 |
| Crystal data                         |                                                                                          |
| Chemical formula                     | $\text{C}_{101}\text{H}_{180}\text{F}_{12}\text{Mn}_2\text{N}_4\text{O}_{12}\text{Sb}_2$ |
| $M_r$                                | 2223.87                                                                                  |
| Crystal system, space group          | Triclinic, $P1$                                                                          |
| Temperature (K)                      | 100                                                                                      |
| $a, b, c$ ( $\text{\AA}$ )           | 9.7378 (12), 16.160 (2), 19.357 (2)                                                      |
| $\alpha, \beta, \gamma$ ( $^\circ$ ) | 74.762 (4), 78.464 (4), 87.099 (4)                                                       |
| $V$ ( $\text{\AA}^3$ )               | 2879.5 (6)                                                                               |
| $Z$                                  | 1                                                                                        |

|                                                                            |                                                   |
|----------------------------------------------------------------------------|---------------------------------------------------|
| Radiation type                                                             | Mo $K\alpha$                                      |
| $\mu$ (mm <sup>-1</sup> )                                                  | 0.75                                              |
| Crystal size (mm)                                                          | 0.36 × 0.18 × 0.05                                |
| Data collection                                                            |                                                   |
| Diffractometer                                                             | CCD area detector diffractometer                  |
| Absorption correction                                                      | Multi-scan<br><i>SADABS</i> (Sheldrick, 2009)     |
| $T_{\min}$ , $T_{\max}$                                                    | 0.774, 0.963                                      |
| No. of measured, independent and observed [ $I > 2\sigma(I)$ ] reflections | 68548, 26061, 24149                               |
| $R_{\text{int}}$                                                           | 0.026                                             |
| Refinement                                                                 |                                                   |
| $R[F^2 > 2\sigma(F^2)]$ , $wR(F^2)$ , $S$                                  | 0.034, 0.072, 1.10                                |
| No. of reflections                                                         | 26061                                             |
| No. of parameters                                                          | 1324                                              |
| No. of restraints                                                          | 272                                               |
| H-atom treatment                                                           | H-atom parameters constrained                     |
| $\Delta\rho_{\max}$ , $\Delta\rho_{\min}$ (e Å <sup>-3</sup> )             | 1.06, -0.64                                       |
| Absolute structure                                                         | Flack H D (1983), <i>Acta Cryst.</i> A39, 876-881 |
| Flack parameter                                                            | -0.016 (10)                                       |

Computer programs: *APEX2* v2009.3.0 (Bruker-AXS, 2009), *SAINT* 7.46A (Bruker-AXS, 2009), *SHELXS97* (Sheldrick, 2008), *SHELXL97* (Sheldrick, 2008), Bruker *SHELXTL*.

**Table 2. Geometric parameters (Å, °)**

|        |           |          |           |
|--------|-----------|----------|-----------|
| Mn1—O2 | 1.879 (3) | C60—H60B | 0.9900    |
| Mn1—O1 | 1.879 (2) | C61—C62  | 1.526 (5) |
| Mn1—N1 | 1.981 (3) | C61—H61A | 0.9900    |
| Mn1—N2 | 1.982 (3) | C61—H61B | 0.9900    |
| Mn1—O4 | 2.248 (3) | C62—C63  | 1.515 (5) |
| Mn1—O3 | 2.284 (2) | C62—H62A | 0.9900    |
| O1—C1  | 1.323 (4) | C62—H62B | 0.9900    |
| O2—C20 | 1.327 (4) | C63—H63A | 1.0000    |
| O3—C37 | 1.440 (4) | C64—C65  | 1.447 (5) |
| O3—H3O | 0.8295    | C64—H64A | 0.9500    |
| O4—C40 | 1.452 (5) | C65—C66  | 1.404 (5) |

|          |           |          |           |
|----------|-----------|----------|-----------|
| O4—H4O   | 0.9668    | C65—C70  | 1.430 (5) |
| N1—C7    | 1.289 (4) | C66—C67  | 1.379 (5) |
| N1—C8    | 1.480 (4) | C66—H66A | 0.9500    |
| N2—C14   | 1.284 (4) | C67—C68  | 1.408 (5) |
| N2—C13   | 1.484 (4) | C67—C79  | 1.534 (4) |
| C1—C6    | 1.408 (5) | C68—C69  | 1.384 (5) |
| C1—C2    | 1.425 (5) | C68—H68A | 0.9500    |
| C2—C3    | 1.398 (5) | C69—C70  | 1.421 (5) |
| C2—C21   | 1.533 (6) | C69—C83  | 1.542 (5) |
| C3—C4    | 1.409 (5) | C71—C73  | 1.527 (6) |
| C3—H3A   | 0.9500    | C71—C74  | 1.537 (6) |
| C4—C5    | 1.363 (5) | C71—C72  | 1.543 (5) |
| C4—C25   | 1.529 (4) | C72—H72A | 0.9800    |
| C5—C6    | 1.419 (5) | C72—H72B | 0.9800    |
| C5—H5A   | 0.9500    | C72—H72C | 0.9800    |
| C6—C7    | 1.435 (5) | C73—H73A | 0.9800    |
| C7—H7A   | 0.9500    | C73—H73B | 0.9800    |
| C8—C13   | 1.520 (4) | C73—H73C | 0.9800    |
| C8—C9    | 1.523 (5) | C74—H74A | 0.9800    |
| C8—H8A   | 1.0000    | C74—H74B | 0.9800    |
| C9—C10   | 1.516 (5) | C74—H74C | 0.9800    |
| C9—H9A   | 0.9900    | C75—C78  | 1.523 (5) |
| C9—H9B   | 0.9900    | C75—C77  | 1.531 (5) |
| C10—C11  | 1.514 (4) | C75—C76  | 1.541 (6) |
| C10—H10A | 0.9900    | C76—H76A | 0.9800    |
| C10—H10B | 0.9900    | C76—H76B | 0.9800    |
| C11—C12  | 1.532 (5) | C76—H76C | 0.9800    |
| C11—H11A | 0.9900    | C77—H77A | 0.9800    |
| C11—H11B | 0.9900    | C77—H77B | 0.9800    |
| C12—C13  | 1.528 (4) | C77—H77C | 0.9800    |
| C12—H12A | 0.9900    | C78—H78A | 0.9800    |
| C12—H12B | 0.9900    | C78—H78B | 0.9800    |
| C13—H13A | 1.0000    | C78—H78C | 0.9800    |
| C14—C15  | 1.446 (5) | C79—C82  | 1.523 (6) |
| C14—H14A | 0.9500    | C79—C80  | 1.536 (6) |
| C15—C16  | 1.410 (5) | C79—C81  | 1.537 (5) |
| C15—C20  | 1.424 (5) | C80—H80A | 0.9800    |

|          |            |           |           |
|----------|------------|-----------|-----------|
| C16—C17  | 1.376 (6)  | C80—H80B  | 0.9800    |
| C16—H16A | 0.9500     | C80—H80C  | 0.9800    |
| C17—C18  | 1.391 (6)  | C81—H81A  | 0.9800    |
| C17—C29  | 1.542 (5)  | C81—H81B  | 0.9800    |
| C18—C19  | 1.386 (5)  | C81—H81C  | 0.9800    |
| C18—H18A | 0.9500     | C82—H82A  | 0.9800    |
| C19—C20  | 1.418 (5)  | C82—H82B  | 0.9800    |
| C19—C33  | 1.542 (6)  | C82—H82C  | 0.9800    |
| C21—C24  | 1.527 (5)  | C83—C85   | 1.537 (5) |
| C21—C23  | 1.541 (5)  | C83—C86   | 1.540 (5) |
| C21—C22  | 1.548 (5)  | C83—C84   | 1.541 (5) |
| C22—H22A | 0.9800     | C84—H84A  | 0.9800    |
| C22—H22B | 0.9800     | C84—H84B  | 0.9800    |
| C22—H22C | 0.9800     | C84—H84C  | 0.9800    |
| C23—H23A | 0.9800     | C85—H85A  | 0.9800    |
| C23—H23B | 0.9800     | C85—H85B  | 0.9800    |
| C23—H23C | 0.9800     | C85—H85C  | 0.9800    |
| C24—H24A | 0.9800     | C86—H86A  | 0.9800    |
| C24—H24B | 0.9800     | C86—H86B  | 0.9800    |
| C24—H24C | 0.9800     | C86—H86C  | 0.9800    |
| C25—C28  | 1.519 (6)  | C87—C88   | 1.488 (8) |
| C25—C26  | 1.538 (5)  | C87—C89   | 1.495 (9) |
| C25—C27  | 1.543 (5)  | C87—H87A  | 1.0000    |
| C26—H26A | 0.9800     | C88—H88A  | 0.9800    |
| C26—H26B | 0.9800     | C88—H88B  | 0.9800    |
| C26—H26C | 0.9800     | C88—H88C  | 0.9800    |
| C27—H27A | 0.9800     | C89—H89A  | 0.9800    |
| C27—H27B | 0.9800     | C89—H89B  | 0.9800    |
| C27—H27C | 0.9800     | C89—H89C  | 0.9800    |
| C28—H28A | 0.9800     | C88B—H88D | 0.9800    |
| C28—H28B | 0.9800     | C88B—H88E | 0.9800    |
| C28—H28C | 0.9800     | C88B—H88F | 0.9800    |
| C29—C32B | 1.450 (8)  | C89B—H89D | 0.9800    |
| C29—C31  | 1.513 (9)  | C89B—H89E | 0.9800    |
| C29—C30  | 1.527 (9)  | C89B—H89F | 0.9800    |
| C29—C31B | 1.528 (9)  | C90—C92   | 1.498 (6) |
| C29—C32  | 1.567 (10) | C90—C91   | 1.516 (6) |

|           |           |          |            |
|-----------|-----------|----------|------------|
| C29—C30B  | 1.654 (8) | C90—H90A | 1.0000     |
| C30—H30A  | 0.9800    | C91—H91A | 0.9800     |
| C30—H30B  | 0.9800    | C91—H91B | 0.9800     |
| C30—H30C  | 0.9800    | C91—H91C | 0.9800     |
| C31—H31A  | 0.9800    | C92—H92A | 0.9800     |
| C31—H31B  | 0.9800    | C92—H92B | 0.9800     |
| C31—H31C  | 0.9800    | C92—H92C | 0.9800     |
| C32—H32A  | 0.9800    | Sb1—F4   | 1.857 (3)  |
| C32—H32B  | 0.9800    | Sb1—F2   | 1.867 (3)  |
| C32—H32C  | 0.9800    | Sb1—F6   | 1.870 (3)  |
| C30B—H30D | 0.9800    | Sb1—F3   | 1.877 (3)  |
| C30B—H30E | 0.9800    | Sb1—F5   | 1.879 (3)  |
| C30B—H30F | 0.9800    | Sb1—F1   | 1.879 (3)  |
| C31B—H31D | 0.9800    | Sb2—F12B | 1.849 (15) |
| C31B—H31E | 0.9800    | Sb2—F11  | 1.868 (5)  |
| C31B—H31F | 0.9800    | Sb2—F8   | 1.870 (3)  |
| C32B—H32D | 0.9800    | Sb2—F10  | 1.873 (3)  |
| C32B—H32E | 0.9800    | Sb2—F7   | 1.876 (3)  |
| C32B—H32F | 0.9800    | Sb2—F12  | 1.877 (5)  |
| C33—C34   | 1.529 (6) | Sb2—F9   | 1.883 (3)  |
| C33—C35   | 1.542 (6) | Sb2—F11B | 1.900 (13) |
| C33—C36   | 1.546 (6) | O1S—C1S  | 1.414 (5)  |
| C34—H34A  | 0.9800    | O1S—H1S  | 0.9238     |
| C34—H34B  | 0.9800    | C1S—C3S  | 1.502 (7)  |
| C34—H34C  | 0.9800    | C1S—C2S  | 1.508 (7)  |
| C35—H35A  | 0.9800    | C1S—H1SA | 1.0000     |
| C35—H35B  | 0.9800    | C2S—H2SA | 0.9800     |
| C35—H35C  | 0.9800    | C2S—H2SB | 0.9800     |
| C36—H36A  | 0.9800    | C2S—H2SC | 0.9800     |
| C36—H36B  | 0.9800    | C3S—H3SA | 0.9800     |
| C36—H36C  | 0.9800    | C3S—H3SB | 0.9800     |
| C37—C38   | 1.514 (5) | C3S—H3SC | 0.9800     |
| C37—C39   | 1.514 (5) | O2S—C4S  | 1.453 (5)  |
| C37—H37A  | 1.0000    | O2S—H2S  | 0.9420     |
| C38—H38A  | 0.9800    | C4S—C6S  | 1.509 (5)  |
| C38—H38B  | 0.9800    | C4S—C5S  | 1.512 (6)  |
| C38—H38C  | 0.9800    | C4S—H4SA | 1.0000     |

|          |           |           |           |
|----------|-----------|-----------|-----------|
| C39—H39A | 0.9800    | C5S—H5SA  | 0.9800    |
| C39—H39B | 0.9800    | C5S—H5SB  | 0.9800    |
| C39—H39C | 0.9800    | C5S—H5SC  | 0.9800    |
| C40—C42  | 1.507 (6) | C6S—H6SA  | 0.9800    |
| C40—C41  | 1.519 (6) | C6S—H6SB  | 0.9800    |
| C40—H40A | 1.0000    | C6S—H6SC  | 0.9800    |
| C41—H41A | 0.9800    | O3S—C7S   | 1.439 (5) |
| C41—H41B | 0.9800    | O3S—H3S   | 0.9166    |
| C41—H41C | 0.9800    | C7S—C9S   | 1.481 (7) |
| C42—H42A | 0.9800    | C7S—C8S   | 1.514 (7) |
| C42—H42B | 0.9800    | C7S—H7SA  | 1.0000    |
| C42—H42C | 0.9800    | C8S—H8SA  | 0.9800    |
| Mn2—O5   | 1.872 (3) | C8S—H8SB  | 0.9800    |
| Mn2—O6   | 1.873 (2) | C8S—H8SC  | 0.9800    |
| Mn2—N4   | 1.981 (3) | C9S—H9SA  | 0.9800    |
| Mn2—N3   | 1.984 (3) | C9S—H9SB  | 0.9800    |
| Mn2—O8   | 2.259 (2) | C9S—H9SC  | 0.9800    |
| Mn2—O7   | 2.292 (2) | O4S—C10S  | 1.430 (5) |
| O5—C51   | 1.317 (4) | O4S—H4S   | 0.9141    |
| O6—C70   | 1.322 (4) | C10S—C12S | 1.511 (5) |
| O7—C87   | 1.448 (4) | C10S—C11S | 1.518 (6) |
| O7—H7O   | 0.9743    | C10S—H10C | 1.0000    |
| O8—C90   | 1.447 (4) | C11S—H11C | 0.9800    |
| O8—H8O   | 0.8558    | C11S—H11D | 0.9800    |
| N3—C57   | 1.287 (4) | C11S—H11E | 0.9800    |
| N3—C58   | 1.489 (4) | C12S—H12C | 0.9800    |
| N4—C64   | 1.283 (4) | C12S—H12D | 0.9800    |
| N4—C63   | 1.493 (4) | C12S—H12E | 0.9800    |
| C51—C56  | 1.413 (5) | C1P—C2P   | 1.516 (9) |
| C51—C52  | 1.432 (5) | C1P—H1PA  | 0.9800    |
| C52—C53  | 1.395 (5) | C1P—H1PB  | 0.9800    |
| C52—C71  | 1.536 (5) | C1P—H1PC  | 0.9800    |
| C53—C54  | 1.416 (5) | C2P—C3P   | 1.424 (9) |
| C53—H53A | 0.9500    | C2P—H2PA  | 0.9900    |
| C54—C55  | 1.377 (6) | C2P—H2PB  | 0.9900    |
| C54—C75  | 1.529 (5) | C3P—C4P   | 1.441 (9) |
| C55—C56  | 1.405 (5) | C3P—H3PA  | 0.9900    |

|            |             |               |           |
|------------|-------------|---------------|-----------|
| C55—H55A   | 0.9500      | C3P—H3PB      | 0.9900    |
| C56—C57    | 1.439 (5)   | C4P—C5P       | 1.435 (9) |
| C57—H57A   | 0.9500      | C4P—H4PA      | 0.9900    |
| C58—C63    | 1.522 (4)   | C4P—H4PB      | 0.9900    |
| C58—C59    | 1.532 (4)   | C5P—H5PA      | 0.9800    |
| C58—H58A   | 1.0000      | C5P—H5PB      | 0.9800    |
| C59—C60    | 1.521 (5)   | C5P—H5PC      | 0.9800    |
| C59—H59A   | 0.9900      | C2Q—H2QA      | 0.9900    |
| C59—H59B   | 0.9900      | C2Q—H2QB      | 0.9900    |
| C60—C61    | 1.531 (5)   | C4Q—H4QA      | 0.9900    |
| C60—H60A   | 0.9900      | C4Q—H4QB      | 0.9900    |
|            |             |               |           |
| O2—Mn1—O1  | 95.08 (11)  | C59—C60—C61   | 111.9 (3) |
| O2—Mn1—N1  | 172.94 (12) | C59—C60—H60A  | 109.2     |
| O1—Mn1—N1  | 91.45 (12)  | C61—C60—H60A  | 109.2     |
| O2—Mn1—N2  | 91.34 (11)  | C59—C60—H60B  | 109.2     |
| O1—Mn1—N2  | 173.53 (11) | C61—C60—H60B  | 109.2     |
| N1—Mn1—N2  | 82.17 (12)  | H60A—C60—H60B | 107.9     |
| O2—Mn1—O4  | 93.43 (11)  | C62—C61—C60   | 112.0 (3) |
| O1—Mn1—O4  | 90.28 (10)  | C62—C61—H61A  | 109.2     |
| N1—Mn1—O4  | 89.22 (11)  | C60—C61—H61A  | 109.2     |
| N2—Mn1—O4  | 88.60 (10)  | C62—C61—H61B  | 109.2     |
| O2—Mn1—O3  | 89.01 (10)  | C60—C61—H61B  | 109.2     |
| O1—Mn1—O3  | 93.16 (10)  | H61A—C61—H61B | 107.9     |
| N1—Mn1—O3  | 87.94 (11)  | C63—C62—C61   | 110.3 (3) |
| N2—Mn1—O3  | 87.67 (10)  | C63—C62—H62A  | 109.6     |
| O4—Mn1—O3  | 175.59 (10) | C61—C62—H62A  | 109.6     |
| C1—O1—Mn1  | 129.2 (2)   | C63—C62—H62B  | 109.6     |
| C20—O2—Mn1 | 130.4 (2)   | C61—C62—H62B  | 109.6     |
| C37—O3—Mn1 | 126.1 (2)   | H62A—C62—H62B | 108.1     |
| C37—O3—H3O | 109.1       | N4—C63—C62    | 115.9 (3) |
| Mn1—O3—H3O | 124.4       | N4—C63—C58    | 106.5 (2) |
| C40—O4—Mn1 | 126.9 (2)   | C62—C63—C58   | 111.0 (3) |
| C40—O4—H4O | 106.3       | N4—C63—H63A   | 107.7     |
| Mn1—O4—H4O | 126.6       | C62—C63—H63A  | 107.7     |
| C7—N1—C8   | 122.3 (3)   | C58—C63—H63A  | 107.7     |
| C7—N1—Mn1  | 124.3 (3)   | N4—C64—C65    | 126.0 (3) |



|            |             |               |           |
|------------|-------------|---------------|-----------|
| C8—N1—Mn1  | 113.40 (19) | N4—C64—H64A   | 117.0     |
| C14—N2—C13 | 122.0 (3)   | C65—C64—H64A  | 117.0     |
| C14—N2—Mn1 | 124.8 (2)   | C66—C65—C70   | 120.6 (3) |
| C13—N2—Mn1 | 113.16 (18) | C66—C65—C64   | 116.1 (3) |
| O1—C1—C6   | 122.0 (3)   | C70—C65—C64   | 123.0 (3) |
| O1—C1—C2   | 119.2 (3)   | C67—C66—C65   | 121.5 (3) |
| C6—C1—C2   | 118.8 (3)   | C67—C66—H66A  | 119.2     |
| C3—C2—C1   | 117.3 (4)   | C65—C66—H66A  | 119.2     |
| C3—C2—C21  | 121.4 (3)   | C66—C67—C68   | 116.8 (3) |
| C1—C2—C21  | 121.3 (3)   | C66—C67—C79   | 122.7 (3) |
| C2—C3—C4   | 124.7 (3)   | C68—C67—C79   | 120.4 (3) |
| C2—C3—H3A  | 117.7       | C69—C68—C67   | 124.7 (3) |
| C4—C3—H3A  | 117.7       | C69—C68—H68A  | 117.6     |
| C5—C4—C3   | 116.8 (3)   | C67—C68—H68A  | 117.6     |
| C5—C4—C25  | 123.2 (3)   | C68—C69—C70   | 117.9 (3) |
| C3—C4—C25  | 120.0 (3)   | C68—C69—C83   | 121.6 (3) |
| C4—C5—C6   | 121.7 (4)   | C70—C69—C83   | 120.4 (3) |
| C4—C5—H5A  | 119.1       | O6—C70—C69    | 120.2 (3) |
| C6—C5—H5A  | 119.1       | O6—C70—C65    | 121.5 (3) |
| C1—C6—C5   | 120.7 (3)   | C69—C70—C65   | 118.3 (3) |
| C1—C6—C7   | 123.3 (3)   | C73—C71—C52   | 110.9 (3) |
| C5—C6—C7   | 116.1 (3)   | C73—C71—C74   | 107.2 (4) |
| N1—C7—C6   | 126.1 (4)   | C52—C71—C74   | 111.9 (3) |
| N1—C7—H7A  | 116.9       | C73—C71—C72   | 110.7 (3) |
| C6—C7—H7A  | 116.9       | C52—C71—C72   | 109.0 (3) |
| N1—C8—C13  | 106.3 (2)   | C74—C71—C72   | 107.1 (4) |
| N1—C8—C9   | 116.6 (3)   | C71—C72—H72A  | 109.5     |
| C13—C8—C9  | 111.2 (3)   | C71—C72—H72B  | 109.5     |
| N1—C8—H8A  | 107.5       | H72A—C72—H72B | 109.5     |
| C13—C8—H8A | 107.5       | C71—C72—H72C  | 109.5     |
| C9—C8—H8A  | 107.5       | H72A—C72—H72C | 109.5     |
| C10—C9—C8  | 110.1 (3)   | H72B—C72—H72C | 109.5     |
| C10—C9—H9A | 109.6       | C71—C73—H73A  | 109.5     |
| C8—C9—H9A  | 109.6       | C71—C73—H73B  | 109.5     |
| C10—C9—H9B | 109.6       | H73A—C73—H73B | 109.5     |
| C8—C9—H9B  | 109.6       | C71—C73—H73C  | 109.5     |
| H9A—C9—H9B | 108.2       | H73A—C73—H73C | 109.5     |

|               |           |               |           |
|---------------|-----------|---------------|-----------|
| C11—C10—C9    | 112.7 (3) | H73B—C73—H73C | 109.5     |
| C11—C10—H10A  | 109.0     | C71—C74—H74A  | 109.5     |
| C9—C10—H10A   | 109.0     | C71—C74—H74B  | 109.5     |
| C11—C10—H10B  | 109.0     | H74A—C74—H74B | 109.5     |
| C9—C10—H10B   | 109.0     | C71—C74—H74C  | 109.5     |
| H10A—C10—H10B | 107.8     | H74A—C74—H74C | 109.5     |
| C10—C11—C12   | 110.9 (3) | H74B—C74—H74C | 109.5     |
| C10—C11—H11A  | 109.5     | C78—C75—C54   | 109.5 (3) |
| C12—C11—H11A  | 109.5     | C78—C75—C77   | 109.9 (3) |
| C10—C11—H11B  | 109.5     | C54—C75—C77   | 108.4 (3) |
| C12—C11—H11B  | 109.5     | C78—C75—C76   | 108.6 (3) |
| H11A—C11—H11B | 108.0     | C54—C75—C76   | 111.5 (3) |
| C13—C12—C11   | 109.2 (3) | C77—C75—C76   | 108.9 (3) |
| C13—C12—H12A  | 109.8     | C75—C76—H76A  | 109.5     |
| C11—C12—H12A  | 109.8     | C75—C76—H76B  | 109.5     |
| C13—C12—H12B  | 109.8     | H76A—C76—H76B | 109.5     |
| C11—C12—H12B  | 109.8     | C75—C76—H76C  | 109.5     |
| H12A—C12—H12B | 108.3     | H76A—C76—H76C | 109.5     |
| N2—C13—C8     | 106.8 (2) | H76B—C76—H76C | 109.5     |
| N2—C13—C12    | 116.8 (2) | C75—C77—H77A  | 109.5     |
| C8—C13—C12    | 110.5 (2) | C75—C77—H77B  | 109.5     |
| N2—C13—H13A   | 107.5     | H77A—C77—H77B | 109.5     |
| C8—C13—H13A   | 107.5     | C75—C77—H77C  | 109.5     |
| C12—C13—H13A  | 107.5     | H77A—C77—H77C | 109.5     |
| N2—C14—C15    | 126.1 (3) | H77B—C77—H77C | 109.5     |
| N2—C14—H14A   | 116.9     | C75—C78—H78A  | 109.5     |
| C15—C14—H14A  | 116.9     | C75—C78—H78B  | 109.5     |
| C16—C15—C20   | 120.3 (3) | H78A—C78—H78B | 109.5     |
| C16—C15—C14   | 116.6 (3) | C75—C78—H78C  | 109.5     |
| C20—C15—C14   | 123.0 (3) | H78A—C78—H78C | 109.5     |
| C17—C16—C15   | 121.5 (4) | H78B—C78—H78C | 109.5     |
| C17—C16—H16A  | 119.3     | C82—C79—C67   | 110.4 (3) |
| C15—C16—H16A  | 119.3     | C82—C79—C80   | 109.1 (4) |
| C16—C17—C18   | 116.8 (3) | C67—C79—C80   | 111.4 (3) |
| C16—C17—C29   | 121.2 (4) | C82—C79—C81   | 108.7 (3) |
| C18—C17—C29   | 122.0 (4) | C67—C79—C81   | 108.4 (3) |
| C19—C18—C17   | 125.2 (4) | C80—C79—C81   | 108.8 (4) |

|               |           |               |           |
|---------------|-----------|---------------|-----------|
| C19—C18—H18A  | 117.4     | C79—C80—H80A  | 109.5     |
| C17—C18—H18A  | 117.4     | C79—C80—H80B  | 109.5     |
| C18—C19—C20   | 117.6 (4) | H80A—C80—H80B | 109.5     |
| C18—C19—C33   | 122.0 (4) | C79—C80—H80C  | 109.5     |
| C20—C19—C33   | 120.4 (3) | H80A—C80—H80C | 109.5     |
| O2—C20—C19    | 120.2 (3) | H80B—C80—H80C | 109.5     |
| O2—C20—C15    | 121.3 (3) | C79—C81—H81A  | 109.5     |
| C19—C20—C15   | 118.5 (3) | C79—C81—H81B  | 109.5     |
| C24—C21—C2    | 112.4 (3) | H81A—C81—H81B | 109.5     |
| C24—C21—C23   | 107.9 (3) | C79—C81—H81C  | 109.5     |
| C2—C21—C23    | 110.5 (3) | H81A—C81—H81C | 109.5     |
| C24—C21—C22   | 107.6 (3) | H81B—C81—H81C | 109.5     |
| C2—C21—C22    | 109.6 (3) | C79—C82—H82A  | 109.5     |
| C23—C21—C22   | 108.8 (3) | C79—C82—H82B  | 109.5     |
| C21—C22—H22A  | 109.5     | H82A—C82—H82B | 109.5     |
| C21—C22—H22B  | 109.5     | C79—C82—H82C  | 109.5     |
| H22A—C22—H22B | 109.5     | H82A—C82—H82C | 109.5     |
| C21—C22—H22C  | 109.5     | H82B—C82—H82C | 109.5     |
| H22A—C22—H22C | 109.5     | C85—C83—C86   | 111.1 (3) |
| H22B—C22—H22C | 109.5     | C85—C83—C84   | 107.5 (3) |
| C21—C23—H23A  | 109.5     | C86—C83—C84   | 107.3 (3) |
| C21—C23—H23B  | 109.5     | C85—C83—C69   | 109.9 (3) |
| H23A—C23—H23B | 109.5     | C86—C83—C69   | 109.6 (3) |
| C21—C23—H23C  | 109.5     | C84—C83—C69   | 111.4 (3) |
| H23A—C23—H23C | 109.5     | C83—C84—H84A  | 109.5     |
| H23B—C23—H23C | 109.5     | C83—C84—H84B  | 109.5     |
| C21—C24—H24A  | 109.5     | H84A—C84—H84B | 109.5     |
| C21—C24—H24B  | 109.5     | C83—C84—H84C  | 109.5     |
| H24A—C24—H24B | 109.5     | H84A—C84—H84C | 109.5     |
| C21—C24—H24C  | 109.5     | H84B—C84—H84C | 109.5     |
| H24A—C24—H24C | 109.5     | C83—C85—H85A  | 109.5     |
| H24B—C24—H24C | 109.5     | C83—C85—H85B  | 109.5     |
| C28—C25—C4    | 112.1 (3) | H85A—C85—H85B | 109.5     |
| C28—C25—C26   | 108.6 (3) | C83—C85—H85C  | 109.5     |
| C4—C25—C26    | 109.9 (3) | H85A—C85—H85C | 109.5     |
| C28—C25—C27   | 108.1 (4) | H85B—C85—H85C | 109.5     |
| C4—C25—C27    | 109.4 (3) | C83—C86—H86A  | 109.5     |

|               |           |                |             |
|---------------|-----------|----------------|-------------|
| C26—C25—C27   | 108.7 (3) | C83—C86—H86B   | 109.5       |
| C25—C26—H26A  | 109.5     | H86A—C86—H86B  | 109.5       |
| C25—C26—H26B  | 109.5     | C83—C86—H86C   | 109.5       |
| H26A—C26—H26B | 109.5     | H86A—C86—H86C  | 109.5       |
| C25—C26—H26C  | 109.5     | H86B—C86—H86C  | 109.5       |
| H26A—C26—H26C | 109.5     | O7—C87—C88     | 115.2 (4)   |
| H26B—C26—H26C | 109.5     | O7—C87—C89     | 114.8 (5)   |
| C25—C27—H27A  | 109.5     | C88—C87—C89    | 96.9 (5)    |
| C25—C27—H27B  | 109.5     | O7—C87—H87A    | 109.8       |
| H27A—C27—H27B | 109.5     | C88—C87—H87A   | 109.8       |
| C25—C27—H27C  | 109.5     | C89—C87—H87A   | 109.8       |
| H27A—C27—H27C | 109.5     | H88D—C88B—H88E | 109.5       |
| H27B—C27—H27C | 109.5     | H88D—C88B—H88F | 109.5       |
| C25—C28—H28A  | 109.5     | H88E—C88B—H88F | 109.5       |
| C25—C28—H28B  | 109.5     | H89D—C89B—H89E | 109.5       |
| H28A—C28—H28B | 109.5     | H89D—C89B—H89F | 109.5       |
| C25—C28—H28C  | 109.5     | H89E—C89B—H89F | 109.5       |
| H28A—C28—H28C | 109.5     | O8—C90—C92     | 110.3 (3)   |
| H28B—C28—H28C | 109.5     | O8—C90—C91     | 109.7 (3)   |
| C32B—C29—C31  | 132.0 (6) | C92—C90—C91    | 112.6 (3)   |
| C32B—C29—C30  | 75.5 (6)  | O8—C90—H90A    | 108.0       |
| C31—C29—C30   | 111.9 (6) | C92—C90—H90A   | 108.0       |
| C32B—C29—C31B | 113.7 (6) | C91—C90—H90A   | 108.0       |
| C30—C29—C31B  | 128.7 (6) | C90—C91—H91A   | 109.5       |
| C32B—C29—C17  | 114.7 (4) | C90—C91—H91B   | 109.5       |
| C31—C29—C17   | 107.2 (5) | H91A—C91—H91B  | 109.5       |
| C30—C29—C17   | 109.4 (4) | C90—C91—H91C   | 109.5       |
| C31B—C29—C17  | 110.6 (5) | H91A—C91—H91C  | 109.5       |
| C31—C29—C32   | 110.3 (6) | H91B—C91—H91C  | 109.5       |
| C30—C29—C32   | 108.2 (6) | C90—C92—H92A   | 109.5       |
| C17—C29—C32   | 109.9 (4) | C90—C92—H92B   | 109.5       |
| C32B—C29—C30B | 106.8 (5) | H92A—C92—H92B  | 109.5       |
| C31B—C29—C30B | 98.7 (5)  | C90—C92—H92C   | 109.5       |
| C17—C29—C30B  | 111.1 (4) | H92A—C92—H92C  | 109.5       |
| C29—C30—H30A  | 109.5     | H92B—C92—H92C  | 109.5       |
| C29—C30—H30B  | 109.5     | F4—Sb1—F2      | 178.83 (17) |
| C29—C30—H30C  | 109.5     | F4—Sb1—F6      | 90.59 (16)  |

|                |           |               |             |
|----------------|-----------|---------------|-------------|
| C29—C31—H31A   | 109.5     | F2—Sb1—F6     | 90.50 (14)  |
| C29—C31—H31B   | 109.5     | F4—Sb1—F3     | 90.20 (13)  |
| C29—C31—H31C   | 109.5     | F2—Sb1—F3     | 89.34 (13)  |
| C29—C32—H32A   | 109.5     | F6—Sb1—F3     | 90.97 (14)  |
| C29—C32—H32B   | 109.5     | F4—Sb1—F5     | 90.00 (15)  |
| C29—C32—H32C   | 109.5     | F2—Sb1—F5     | 88.93 (13)  |
| C29—C30B—H30D  | 109.5     | F6—Sb1—F5     | 178.63 (14) |
| C29—C30B—H30E  | 109.5     | F3—Sb1—F5     | 90.26 (13)  |
| H30D—C30B—H30E | 109.5     | F4—Sb1—F1     | 90.57 (13)  |
| C29—C30B—H30F  | 109.5     | F2—Sb1—F1     | 89.86 (14)  |
| H30D—C30B—H30F | 109.5     | F6—Sb1—F1     | 90.45 (14)  |
| H30E—C30B—H30F | 109.5     | F3—Sb1—F1     | 178.37 (15) |
| C29—C31B—H31D  | 109.5     | F5—Sb1—F1     | 88.30 (13)  |
| C29—C31B—H31E  | 109.5     | F12B—Sb2—F11  | 169.2 (10)  |
| H31D—C31B—H31E | 109.5     | F12B—Sb2—F8   | 83.7 (14)   |
| C29—C31B—H31F  | 109.5     | F11—Sb2—F8    | 87.73 (19)  |
| H31D—C31B—H31F | 109.5     | F12B—Sb2—F10  | 95.0 (14)   |
| H31E—C31B—H31F | 109.5     | F11—Sb2—F10   | 93.51 (18)  |
| C29—C32B—H32D  | 109.5     | F8—Sb2—F10    | 178.29 (18) |
| C29—C32B—H32E  | 109.5     | F12B—Sb2—F7   | 83.7 (9)    |
| H32D—C32B—H32E | 109.5     | F11—Sb2—F7    | 89.8 (2)    |
| C29—C32B—H32F  | 109.5     | F8—Sb2—F7     | 90.63 (16)  |
| H32D—C32B—H32F | 109.5     | F10—Sb2—F7    | 88.19 (14)  |
| H32E—C32B—H32F | 109.5     | F11—Sb2—F12   | 177.3 (5)   |
| C34—C33—C19    | 109.6 (3) | F8—Sb2—F12    | 90.4 (4)    |
| C34—C33—C35    | 108.0 (4) | F10—Sb2—F12   | 88.4 (4)    |
| C19—C33—C35    | 112.2 (3) | F7—Sb2—F12    | 92.2 (3)    |
| C34—C33—C36    | 109.5 (3) | F12B—Sb2—F9   | 94.3 (9)    |
| C19—C33—C36    | 110.2 (4) | F11—Sb2—F9    | 92.4 (2)    |
| C35—C33—C36    | 107.3 (4) | F8—Sb2—F9     | 90.92 (16)  |
| C33—C34—H34A   | 109.5     | F10—Sb2—F9    | 90.21 (15)  |
| C33—C34—H34B   | 109.5     | F7—Sb2—F9     | 177.36 (16) |
| H34A—C34—H34B  | 109.5     | F12—Sb2—F9    | 85.7 (3)    |
| C33—C34—H34C   | 109.5     | F12B—Sb2—F11B | 174.9 (15)  |
| H34A—C34—H34C  | 109.5     | F8—Sb2—F11B   | 101.5 (5)   |
| H34B—C34—H34C  | 109.5     | F10—Sb2—F11B  | 79.9 (5)    |
| C33—C35—H35A   | 109.5     | F7—Sb2—F11B   | 96.0 (7)    |

|               |           |               |           |
|---------------|-----------|---------------|-----------|
| C33—C35—H35B  | 109.5     | F9—Sb2—F11B   | 85.8 (7)  |
| H35A—C35—H35B | 109.5     | C1S—O1S—H1S   | 113.0     |
| C33—C35—H35C  | 109.5     | O1S—C1S—C3S   | 106.9 (4) |
| H35A—C35—H35C | 109.5     | O1S—C1S—C2S   | 111.1 (4) |
| H35B—C35—H35C | 109.5     | C3S—C1S—C2S   | 113.5 (4) |
| C33—C36—H36A  | 109.5     | O1S—C1S—H1SA  | 108.4     |
| C33—C36—H36B  | 109.5     | C3S—C1S—H1SA  | 108.4     |
| H36A—C36—H36B | 109.5     | C2S—C1S—H1SA  | 108.4     |
| C33—C36—H36C  | 109.5     | C1S—C2S—H2SA  | 109.5     |
| H36A—C36—H36C | 109.5     | C1S—C2S—H2SB  | 109.5     |
| H36B—C36—H36C | 109.5     | H2SA—C2S—H2SB | 109.5     |
| O3—C37—C38    | 110.6 (3) | C1S—C2S—H2SC  | 109.5     |
| O3—C37—C39    | 109.8 (3) | H2SA—C2S—H2SC | 109.5     |
| C38—C37—C39   | 111.8 (3) | H2SB—C2S—H2SC | 109.5     |
| O3—C37—H37A   | 108.2     | C1S—C3S—H3SA  | 109.5     |
| C38—C37—H37A  | 108.2     | C1S—C3S—H3SB  | 109.5     |
| C39—C37—H37A  | 108.2     | H3SA—C3S—H3SB | 109.5     |
| C37—C38—H38A  | 109.5     | C1S—C3S—H3SC  | 109.5     |
| C37—C38—H38B  | 109.5     | H3SA—C3S—H3SC | 109.5     |
| H38A—C38—H38B | 109.5     | H3SB—C3S—H3SC | 109.5     |
| C37—C38—H38C  | 109.5     | C4S—O2S—H2S   | 111.8     |
| H38A—C38—H38C | 109.5     | O2S—C4S—C6S   | 109.9 (4) |
| H38B—C38—H38C | 109.5     | O2S—C4S—C5S   | 106.3 (3) |
| C37—C39—H39A  | 109.5     | C6S—C4S—C5S   | 113.4 (3) |
| C37—C39—H39B  | 109.5     | O2S—C4S—H4SA  | 109.0     |
| H39A—C39—H39B | 109.5     | C6S—C4S—H4SA  | 109.0     |
| C37—C39—H39C  | 109.5     | C5S—C4S—H4SA  | 109.0     |
| H39A—C39—H39C | 109.5     | C4S—C5S—H5SA  | 109.5     |
| H39B—C39—H39C | 109.5     | C4S—C5S—H5SB  | 109.5     |
| O4—C40—C42    | 110.6 (3) | H5SA—C5S—H5SB | 109.5     |
| O4—C40—C41    | 109.3 (4) | C4S—C5S—H5SC  | 109.5     |
| C42—C40—C41   | 113.5 (4) | H5SA—C5S—H5SC | 109.5     |
| O4—C40—H40A   | 107.7     | H5SB—C5S—H5SC | 109.5     |
| C42—C40—H40A  | 107.7     | C4S—C6S—H6SA  | 109.5     |
| C41—C40—H40A  | 107.7     | C4S—C6S—H6SB  | 109.5     |
| C40—C41—H41A  | 109.5     | H6SA—C6S—H6SB | 109.5     |
| C40—C41—H41B  | 109.5     | C4S—C6S—H6SC  | 109.5     |

|               |             |                |           |
|---------------|-------------|----------------|-----------|
| H41A—C41—H41B | 109.5       | H6SA—C6S—H6SC  | 109.5     |
| C40—C41—H41C  | 109.5       | H6SB—C6S—H6SC  | 109.5     |
| H41A—C41—H41C | 109.5       | C7S—O3S—H3S    | 109.1     |
| H41B—C41—H41C | 109.5       | O3S—C7S—C9S    | 111.1 (4) |
| C40—C42—H42A  | 109.5       | O3S—C7S—C8S    | 106.1 (4) |
| C40—C42—H42B  | 109.5       | C9S—C7S—C8S    | 114.0 (4) |
| H42A—C42—H42B | 109.5       | O3S—C7S—H7SA   | 108.5     |
| C40—C42—H42C  | 109.5       | C9S—C7S—H7SA   | 108.5     |
| H42A—C42—H42C | 109.5       | C8S—C7S—H7SA   | 108.5     |
| H42B—C42—H42C | 109.5       | C7S—C8S—H8SA   | 109.5     |
| O5—Mn2—O6     | 94.70 (11)  | C7S—C8S—H8SB   | 109.5     |
| O5—Mn2—N4     | 169.35 (12) | H8SA—C8S—H8SB  | 109.5     |
| O6—Mn2—N4     | 91.84 (12)  | C7S—C8S—H8SC   | 109.5     |
| O5—Mn2—N3     | 91.76 (11)  | H8SA—C8S—H8SC  | 109.5     |
| O6—Mn2—N3     | 169.93 (11) | H8SB—C8S—H8SC  | 109.5     |
| N4—Mn2—N3     | 82.97 (12)  | C7S—C9S—H9SA   | 109.5     |
| O5—Mn2—O8     | 94.90 (11)  | C7S—C9S—H9SB   | 109.5     |
| O6—Mn2—O8     | 88.70 (10)  | H9SA—C9S—H9SB  | 109.5     |
| N4—Mn2—O8     | 93.63 (11)  | C7S—C9S—H9SC   | 109.5     |
| N3—Mn2—O8     | 83.05 (10)  | H9SA—C9S—H9SC  | 109.5     |
| O5—Mn2—O7     | 88.51 (10)  | H9SB—C9S—H9SC  | 109.5     |
| O6—Mn2—O7     | 92.93 (10)  | C10S—O4S—H4S   | 102.8     |
| N4—Mn2—O7     | 82.77 (11)  | O4S—C10S—C12S  | 110.7 (4) |
| N3—Mn2—O7     | 94.96 (10)  | O4S—C10S—C11S  | 106.9 (3) |
| O8—Mn2—O7     | 176.09 (10) | C12S—C10S—C11S | 112.3 (3) |
| C51—O5—Mn2    | 131.0 (2)   | O4S—C10S—H10C  | 109.0     |
| C70—O6—Mn2    | 131.2 (2)   | C12S—C10S—H10C | 109.0     |
| C87—O7—Mn2    | 128.4 (2)   | C11S—C10S—H10C | 109.0     |
| C87—O7—H7O    | 110.8       | C10S—C11S—H11C | 109.5     |
| Mn2—O7—H7O    | 120.1       | C10S—C11S—H11D | 109.5     |
| C90—O8—Mn2    | 128.5 (2)   | H11C—C11S—H11D | 109.5     |
| C90—O8—H8O    | 109.0       | C10S—C11S—H11E | 109.5     |
| Mn2—O8—H8O    | 121.1       | H11C—C11S—H11E | 109.5     |
| C57—N3—C58    | 121.5 (3)   | H11D—C11S—H11E | 109.5     |
| C57—N3—Mn2    | 125.4 (2)   | C10S—C12S—H12C | 109.5     |
| C58—N3—Mn2    | 112.52 (18) | C10S—C12S—H12D | 109.5     |
| C64—N4—C63    | 121.3 (3)   | H12C—C12S—H12D | 109.5     |

|               |           |                |            |
|---------------|-----------|----------------|------------|
| C64—N4—Mn2    | 125.6 (3) | C10S—C12S—H12E | 109.5      |
| C63—N4—Mn2    | 112.3 (2) | H12C—C12S—H12E | 109.5      |
| O5—C51—C56    | 122.5 (3) | H12D—C12S—H12E | 109.5      |
| O5—C51—C52    | 118.9 (3) | C2P—C1P—H1PA   | 109.5      |
| C56—C51—C52   | 118.6 (3) | C2P—C1P—H1PB   | 109.5      |
| C53—C52—C51   | 117.5 (3) | H1PA—C1P—H1PB  | 109.5      |
| C53—C52—C71   | 121.5 (3) | C2P—C1P—H1PC   | 109.5      |
| C51—C52—C71   | 120.9 (3) | H1PA—C1P—H1PC  | 109.5      |
| C52—C53—C54   | 124.5 (4) | H1PB—C1P—H1PC  | 109.5      |
| C52—C53—H53A  | 117.8     | C3P—C2P—C1P    | 122.8 (12) |
| C54—C53—H53A  | 117.8     | C3P—C2P—H2PA   | 106.6      |
| C55—C54—C53   | 116.4 (3) | C1P—C2P—H2PA   | 106.6      |
| C55—C54—C75   | 121.4 (3) | C3P—C2P—H2PB   | 106.6      |
| C53—C54—C75   | 122.2 (3) | C1P—C2P—H2PB   | 106.6      |
| C54—C55—C56   | 122.1 (3) | H2PA—C2P—H2PB  | 106.6      |
| C54—C55—H55A  | 119.0     | C2P—C3P—C4P    | 99.8 (8)   |
| C56—C55—H55A  | 119.0     | C2P—C3P—H3PA   | 111.8      |
| C55—C56—C51   | 120.7 (3) | C4P—C3P—H3PA   | 111.8      |
| C55—C56—C57   | 116.2 (3) | C2P—C3P—H3PB   | 111.8      |
| C51—C56—C57   | 123.1 (3) | C4P—C3P—H3PB   | 111.8      |
| N3—C57—C56    | 126.0 (3) | H3PA—C3P—H3PB  | 109.5      |
| N3—C57—H57A   | 117.0     | C5P—C4P—C3P    | 115.6 (11) |
| C56—C57—H57A  | 117.0     | C5P—C4P—H4PA   | 108.4      |
| N3—C58—C63    | 106.5 (2) | C3P—C4P—H4PA   | 108.4      |
| N3—C58—C59    | 116.1 (2) | C5P—C4P—H4PB   | 108.4      |
| C63—C58—C59   | 110.7 (2) | C3P—C4P—H4PB   | 108.4      |
| N3—C58—H58A   | 107.7     | H4PA—C4P—H4PB  | 107.5      |
| C63—C58—H58A  | 107.7     | C4P—C5P—H5PA   | 109.5      |
| C59—C58—H58A  | 107.7     | C4P—C5P—H5PB   | 109.5      |
| C60—C59—C58   | 109.9 (3) | H5PA—C5P—H5PB  | 109.5      |
| C60—C59—H59A  | 109.7     | C4P—C5P—H5PC   | 109.5      |
| C58—C59—H59A  | 109.7     | H5PA—C5P—H5PC  | 109.5      |
| C60—C59—H59B  | 109.7     | H5PB—C5P—H5PC  | 109.5      |
| C58—C59—H59B  | 109.7     | H2QA—C2Q—H2QB  | 106.3      |
| H59A—C59—H59B | 108.2     | H4QA—C4Q—H4QB  | 107.3      |
|               |           |                |            |
| O2—Mn1—O1—C1  | 155.9 (3) | N4—Mn2—O5—C51  | 65.7 (7)   |



|               |              |                |              |
|---------------|--------------|----------------|--------------|
| N1—Mn1—O1—C1  | -21.4 (3)    | N3—Mn2—O5—C51  | 5.7 (3)      |
| O4—Mn1—O1—C1  | -110.6 (3)   | O8—Mn2—O5—C51  | -77.5 (3)    |
| O3—Mn1—O1—C1  | 66.6 (3)     | O7—Mn2—O5—C51  | 100.6 (3)    |
| O1—Mn1—O2—C20 | 160.6 (3)    | O5—Mn2—O6—C70  | -161.8 (3)   |
| N2—Mn1—O2—C20 | -18.7 (3)    | N4—Mn2—O6—C70  | 9.8 (3)      |
| O4—Mn1—O2—C20 | 70.0 (3)     | N3—Mn2—O6—C70  | 68.5 (7)     |
| O3—Mn1—O2—C20 | -106.3 (3)   | O8—Mn2—O6—C70  | 103.4 (3)    |
| O2—Mn1—O3—C37 | 22.8 (3)     | O7—Mn2—O6—C70  | -73.1 (3)    |
| O1—Mn1—O3—C37 | 117.8 (3)    | O5—Mn2—O7—C87  | -33.4 (3)    |
| N1—Mn1—O3—C37 | -150.8 (3)   | O6—Mn2—O7—C87  | -128.1 (3)   |
| N2—Mn1—O3—C37 | -68.6 (3)    | N4—Mn2—O7—C87  | 140.4 (3)    |
| O2—Mn1—O4—C40 | 98.2 (3)     | N3—Mn2—O7—C87  | 58.2 (3)     |
| O1—Mn1—O4—C40 | 3.1 (3)      | O5—Mn2—O8—C90  | -90.6 (3)    |
| N1—Mn1—O4—C40 | -88.4 (3)    | O6—Mn2—O8—C90  | 4.1 (3)      |
| N2—Mn1—O4—C40 | -170.5 (3)   | N4—Mn2—O8—C90  | 95.8 (3)     |
| O1—Mn1—N1—C7  | 15.0 (3)     | N3—Mn2—O8—C90  | 178.3 (3)    |
| N2—Mn1—N1—C7  | -166.1 (3)   | O5—Mn2—N3—C57  | -5.0 (3)     |
| O4—Mn1—N1—C7  | 105.2 (3)    | O6—Mn2—N3—C57  | 124.9 (6)    |
| O3—Mn1—N1—C7  | -78.1 (3)    | N4—Mn2—N3—C57  | -175.7 (3)   |
| O1—Mn1—N1—C8  | -164.7 (2)   | O8—Mn2—N3—C57  | 89.8 (3)     |
| N2—Mn1—N1—C8  | 14.2 (2)     | O7—Mn2—N3—C57  | -93.6 (3)    |
| O4—Mn1—N1—C8  | -74.5 (2)    | O5—Mn2—N3—C58  | -175.97 (19) |
| O3—Mn1—N1—C8  | 102.2 (2)    | O6—Mn2—N3—C58  | -46.1 (7)    |
| O2—Mn1—N2—C14 | 14.5 (3)     | N4—Mn2—N3—C58  | 13.31 (19)   |
| N1—Mn1—N2—C14 | -168.3 (3)   | O8—Mn2—N3—C58  | -81.24 (19)  |
| O4—Mn1—N2—C14 | -78.9 (3)    | O7—Mn2—N3—C58  | 95.38 (19)   |
| O3—Mn1—N2—C14 | 103.5 (3)    | O5—Mn2—N4—C64  | 123.3 (6)    |
| O2—Mn1—N2—C13 | -164.32 (19) | O6—Mn2—N4—C64  | -4.6 (3)     |
| N1—Mn1—N2—C13 | 12.88 (19)   | N3—Mn2—N4—C64  | -175.9 (3)   |
| O4—Mn1—N2—C13 | 102.29 (19)  | O8—Mn2—N4—C64  | -93.4 (3)    |
| O3—Mn1—N2—C13 | -75.36 (19)  | O7—Mn2—N4—C64  | 88.2 (3)     |
| Mn1—O1—C1—C6  | 16.5 (5)     | O5—Mn2—N4—C63  | -46.6 (7)    |
| Mn1—O1—C1—C2  | -164.3 (2)   | O6—Mn2—N4—C63  | -174.5 (2)   |
| O1—C1—C2—C3   | 178.9 (3)    | N3—Mn2—N4—C63  | 14.2 (2)     |
| C6—C1—C2—C3   | -1.9 (5)     | O8—Mn2—N4—C63  | 96.7 (2)     |
| O1—C1—C2—C21  | -1.4 (5)     | O7—Mn2—N4—C63  | -81.8 (2)    |
| C6—C1—C2—C21  | 177.8 (3)    | Mn2—O5—C51—C56 | -3.5 (5)     |

|                 |            |                 |            |
|-----------------|------------|-----------------|------------|
| C1—C2—C3—C4     | 0.3 (5)    | Mn2—O5—C51—C52  | 177.9 (2)  |
| C21—C2—C3—C4    | -179.5 (3) | O5—C51—C52—C53  | -176.1 (3) |
| C2—C3—C4—C5     | 1.7 (5)    | C56—C51—C52—C53 | 5.2 (5)    |
| C2—C3—C4—C25    | -177.1 (3) | O5—C51—C52—C71  | 5.2 (5)    |
| C3—C4—C5—C6     | -2.0 (5)   | C56—C51—C52—C71 | -173.4 (3) |
| C25—C4—C5—C6    | 176.7 (3)  | C51—C52—C53—C54 | -2.4 (6)   |
| O1—C1—C6—C5     | -179.2 (3) | C71—C52—C53—C54 | 176.3 (3)  |
| C2—C1—C6—C5     | 1.7 (5)    | C52—C53—C54—C55 | -1.6 (6)   |
| O1—C1—C6—C7     | 1.6 (5)    | C52—C53—C54—C75 | 176.2 (3)  |
| C2—C1—C6—C7     | -177.6 (3) | C53—C54—C55—C56 | 2.8 (5)    |
| C4—C5—C6—C1     | 0.4 (5)    | C75—C54—C55—C56 | -175.1 (3) |
| C4—C5—C6—C7     | 179.7 (3)  | C54—C55—C56—C51 | 0.2 (5)    |
| C8—N1—C7—C6     | 175.0 (3)  | C54—C55—C56—C57 | 178.8 (3)  |
| Mn1—N1—C7—C6    | -4.6 (5)   | O5—C51—C56—C55  | 177.1 (3)  |
| C1—C6—C7—N1     | -7.2 (6)   | C52—C51—C56—C55 | -4.3 (5)   |
| C5—C6—C7—N1     | 173.6 (3)  | O5—C51—C56—C57  | -1.5 (5)   |
| C7—N1—C8—C13    | 143.4 (3)  | C52—C51—C56—C57 | 177.1 (3)  |
| Mn1—N1—C8—C13   | -36.9 (3)  | C58—N3—C57—C56  | 172.6 (3)  |
| C7—N1—C8—C9     | 18.9 (5)   | Mn2—N3—C57—C56  | 2.3 (4)    |
| Mn1—N1—C8—C9    | -161.4 (2) | C55—C56—C57—N3  | -176.8 (3) |
| N1—C8—C9—C10    | 177.6 (3)  | C51—C56—C57—N3  | 1.9 (5)    |
| C13—C8—C9—C10   | 55.6 (4)   | C57—N3—C58—C63  | 151.8 (3)  |
| C8—C9—C10—C11   | -54.3 (4)  | Mn2—N3—C58—C63  | -36.8 (3)  |
| C9—C10—C11—C12  | 55.7 (4)   | C57—N3—C58—C59  | 28.0 (4)   |
| C10—C11—C12—C13 | -56.8 (4)  | Mn2—N3—C58—C59  | -160.6 (2) |
| C14—N2—C13—C8   | 145.2 (3)  | N3—C58—C59—C60  | 179.0 (3)  |
| Mn1—N2—C13—C8   | -35.9 (3)  | C63—C58—C59—C60 | 57.4 (4)   |
| C14—N2—C13—C12  | 21.0 (4)   | C58—C59—C60—C61 | -54.8 (4)  |
| Mn1—N2—C13—C12  | -160.1 (2) | C59—C60—C61—C62 | 54.0 (4)   |
| N1—C8—C13—N2    | 45.3 (3)   | C60—C61—C62—C63 | -54.3 (4)  |
| C9—C8—C13—N2    | 173.2 (2)  | C64—N4—C63—C62  | 28.1 (4)   |
| N1—C8—C13—C12   | 173.2 (3)  | Mn2—N4—C63—C62  | -161.5 (2) |
| C9—C8—C13—C12   | -58.9 (3)  | C64—N4—C63—C58  | 152.1 (3)  |
| C11—C12—C13—N2  | -179.1 (3) | Mn2—N4—C63—C58  | -37.5 (3)  |
| C11—C12—C13—C8  | 58.7 (3)   | C61—C62—C63—N4  | 178.7 (3)  |
| C13—N2—C14—C15  | 173.6 (3)  | C61—C62—C63—C58 | 57.0 (4)   |
| Mn1—N2—C14—C15  | -5.1 (5)   | N3—C58—C63—N4   | 46.6 (3)   |

|                  |            |                 |            |
|------------------|------------|-----------------|------------|
| N2—C14—C15—C16   | 176.5 (3)  | C59—C58—C63—N4  | 173.7 (3)  |
| N2—C14—C15—C20   | -7.6 (5)   | N3—C58—C63—C62  | 173.6 (3)  |
| C20—C15—C16—C17  | 0.8 (5)    | C59—C58—C63—C62 | -59.3 (3)  |
| C14—C15—C16—C17  | 176.8 (3)  | C63—N4—C64—C65  | 169.6 (3)  |
| C15—C16—C17—C18  | -2.9 (5)   | Mn2—N4—C64—C65  | 0.6 (5)    |
| C15—C16—C17—C29  | 177.1 (3)  | N4—C64—C65—C66  | -172.6 (3) |
| C16—C17—C18—C19  | 2.0 (6)    | N4—C64—C65—C70  | 1.4 (5)    |
| C29—C17—C18—C19  | -178.1 (3) | C70—C65—C66—C67 | -0.8 (5)   |
| C17—C18—C19—C20  | 1.2 (6)    | C64—C65—C66—C67 | 173.3 (3)  |
| C17—C18—C19—C33  | -176.5 (4) | C65—C66—C67—C68 | 2.1 (5)    |
| Mn1—O2—C20—C19   | -170.0 (2) | C65—C66—C67—C79 | -174.6 (3) |
| Mn1—O2—C20—C15   | 12.2 (5)   | C66—C67—C68—C69 | -0.7 (5)   |
| C18—C19—C20—O2   | 178.8 (3)  | C79—C67—C68—C69 | 176.0 (3)  |
| C33—C19—C20—O2   | -3.5 (5)   | C67—C68—C69—C70 | -1.9 (5)   |
| C18—C19—C20—C15  | -3.4 (5)   | C67—C68—C69—C83 | -179.8 (3) |
| C33—C19—C20—C15  | 174.4 (3)  | Mn2—O6—C70—C69  | 168.5 (2)  |
| C16—C15—C20—O2   | -179.8 (3) | Mn2—O6—C70—C65  | -10.4 (5)  |
| C14—C15—C20—O2   | 4.5 (5)    | C68—C69—C70—O6  | -175.8 (3) |
| C16—C15—C20—C19  | 2.4 (5)    | C83—C69—C70—O6  | 2.0 (5)    |
| C14—C15—C20—C19  | -173.3 (3) | C68—C69—C70—C65 | 3.1 (5)    |
| C3—C2—C21—C24    | -1.7 (5)   | C83—C69—C70—C65 | -179.0 (3) |
| C1—C2—C21—C24    | 178.5 (3)  | C66—C65—C70—O6  | 177.1 (3)  |
| C3—C2—C21—C23    | 118.8 (4)  | C64—C65—C70—O6  | 3.4 (5)    |
| C1—C2—C21—C23    | -60.9 (4)  | C66—C65—C70—C69 | -1.9 (5)   |
| C3—C2—C21—C22    | -121.3 (4) | C64—C65—C70—C69 | -175.6 (3) |
| C1—C2—C21—C22    | 59.0 (4)   | C53—C52—C71—C73 | 119.0 (4)  |
| C5—C4—C25—C28    | 7.1 (5)    | C51—C52—C71—C73 | -62.3 (4)  |
| C3—C4—C25—C28    | -174.2 (3) | C53—C52—C71—C74 | -0.6 (5)   |
| C5—C4—C25—C26    | -113.7 (4) | C51—C52—C71—C74 | 178.0 (4)  |
| C3—C4—C25—C26    | 65.0 (4)   | C53—C52—C71—C72 | -118.9 (4) |
| C5—C4—C25—C27    | 127.0 (4)  | C51—C52—C71—C72 | 59.7 (5)   |
| C3—C4—C25—C27    | -54.3 (4)  | C55—C54—C75—C78 | -52.7 (5)  |
| C16—C17—C29—C32B | 132.2 (5)  | C53—C54—C75—C78 | 129.6 (4)  |
| C18—C17—C29—C32B | -47.8 (6)  | C55—C54—C75—C77 | 67.2 (5)   |
| C16—C17—C29—C31  | -71.8 (6)  | C53—C54—C75—C77 | -110.5 (4) |
| C18—C17—C29—C31  | 108.2 (6)  | C55—C54—C75—C76 | -173.0 (3) |
| C16—C17—C29—C30  | 49.6 (6)   | C53—C54—C75—C76 | 9.4 (5)    |

|                  |            |                 |             |
|------------------|------------|-----------------|-------------|
| C18—C17—C29—C30  | -130.3 (6) | C66—C67—C79—C82 | -133.1 (4)  |
| C16—C17—C29—C31B | -97.6 (5)  | C68—C67—C79—C82 | 50.3 (5)    |
| C18—C17—C29—C31B | 82.5 (5)   | C66—C67—C79—C80 | -11.8 (5)   |
| C16—C17—C29—C32  | 168.3 (5)  | C68—C67—C79—C80 | 171.7 (4)   |
| C18—C17—C29—C32  | -11.7 (6)  | C66—C67—C79—C81 | 107.9 (4)   |
| C16—C17—C29—C30B | 11.0 (6)   | C68—C67—C79—C81 | -68.6 (4)   |
| C18—C17—C29—C30B | -168.9 (4) | C68—C69—C83—C85 | -119.4 (3)  |
| C18—C19—C33—C34  | 117.9 (4)  | C70—C69—C83—C85 | 62.8 (4)    |
| C20—C19—C33—C34  | -59.7 (5)  | C68—C69—C83—C86 | 118.2 (3)   |
| C18—C19—C33—C35  | -2.0 (6)   | C70—C69—C83—C86 | -59.6 (4)   |
| C20—C19—C33—C35  | -179.6 (4) | C68—C69—C83—C84 | -0.5 (5)    |
| C18—C19—C33—C36  | -121.4 (4) | C70—C69—C83—C84 | -178.3 (3)  |
| C20—C19—C33—C36  | 60.9 (5)   | Mn2—O7—C87—C88  | 136.1 (4)   |
| Mn1—O3—C37—C38   | 119.2 (3)  | Mn2—O7—C87—C89  | -112.6 (5)  |
| Mn1—O3—C37—C39   | -117.0 (3) | Mn2—O8—C90—C92  | 99.8 (3)    |
| Mn1—O4—C40—C42   | 129.1 (3)  | Mn2—O8—C90—C91  | -135.7 (3)  |
| Mn1—O4—C40—C41   | -105.3 (3) | C1P—C2P—C3P—C4P | 168.8 (12)  |
| O6—Mn2—O5—C51    | -166.5 (3) | C2P—C3P—C4P—C5P | -174.6 (12) |

**Table 3. Hydrogen-bond parameters**

| $D-H\cdots A$                      | $D-H$ (Å) | $H\cdots A$ (Å) | $D\cdots A$ (Å) | $D-H\cdots A$ (°) |
|------------------------------------|-----------|-----------------|-----------------|-------------------|
| O3—H3O $\cdots$ O2S <sup>i</sup>   | 0.83      | 1.93            | 2.757 (4)       | 177.9             |
| O4—H4O $\cdots$ O3S                | 0.97      | 1.75            | 2.712 (4)       | 172.8             |
| O7—H7O $\cdots$ O4S                | 0.97      | 1.82            | 2.787 (4)       | 171.9             |
| O8—H8O $\cdots$ O1S <sup>ii</sup>  | 0.86      | 1.92            | 2.756 (4)       | 166.7             |
| O1S—H1S $\cdots$ F3                | 0.92      | 1.87            | 2.791 (4)       | 173.8             |
| O2S—H2S $\cdots$ F1                | 0.94      | 1.98            | 2.875 (4)       | 158.6             |
| O3S—H3S $\cdots$ F7 <sup>iii</sup> | 0.92      | 1.88            | 2.780 (5)       | 165.1             |
| O4S—H4S $\cdots$ F9                | 0.91      | 2.00            | 2.898 (4)       | 167.5             |

Symmetry code(s): (i)  $x, y-1, z$ ; (ii)  $x+1, y, z$ ; (iii)  $x-1, y-1, z$ .

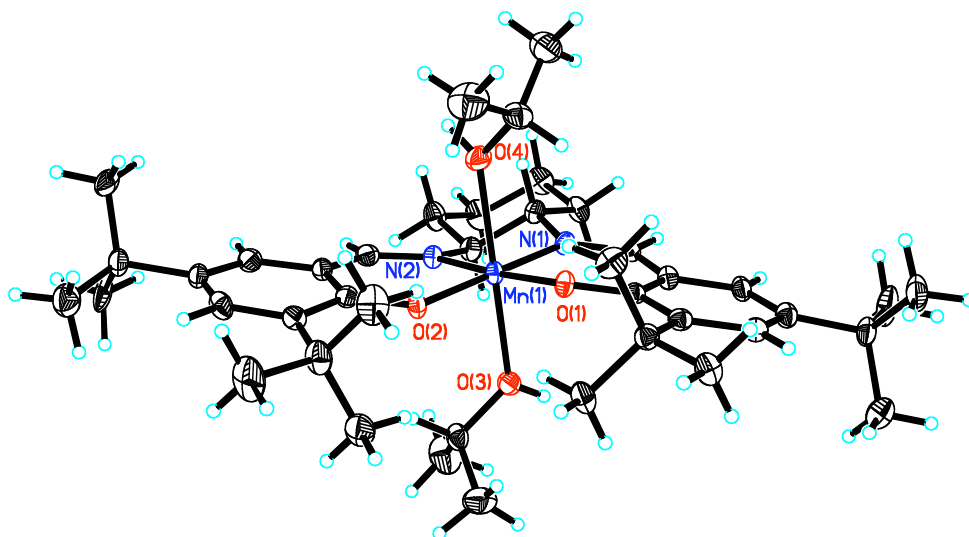

Figure 1a

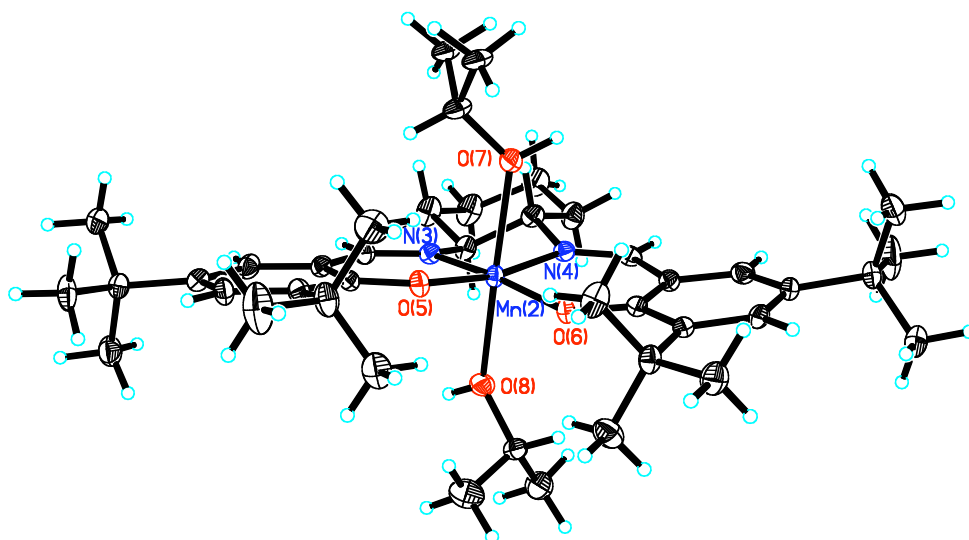

Figure 1b

**Figure 1.** Perspective views showing 50% probability for two independent cations (disorder part has been omitted).

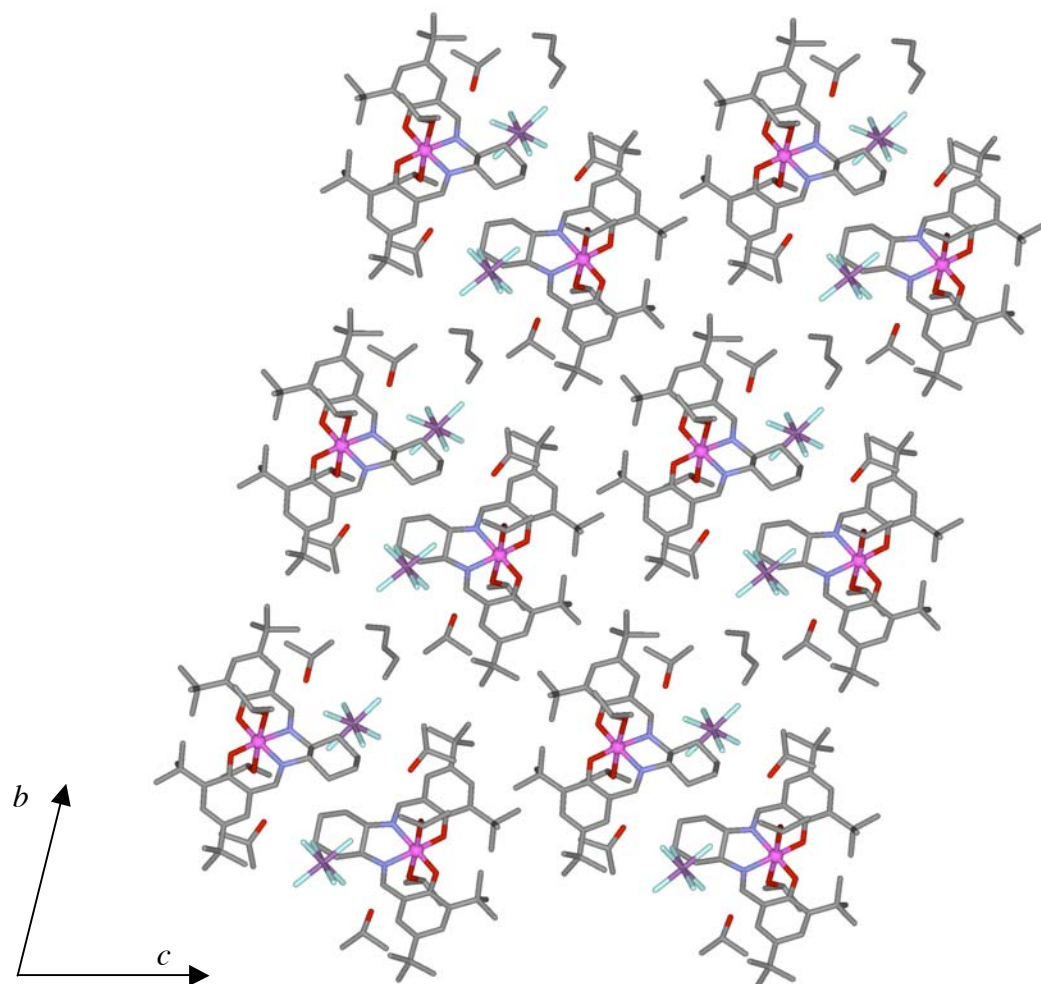

**Figure 2.** Three-dimensional supramolecular architecture viewed along the *a*-axis direction (disorder part has been omitted).
